# Supplementary material for: Ruthenium complex bearing pyrrolbipyridine and dimethyl sulfoxide ligands: syntheses, structures, substitution reactions, and catalytic ammonia oxidation behavior
Source: Royal Society of Chemistry journal article supplement (doi:10.1039/d5dt01772f), 2026-01-01
Supplement: d5dt01772f1.pdf [file d5dt01772f1.pdf]

Supplementary Information for

**Ruthenium Complex Bearing Pyrrolbipyridine and Dimethyl  
Sulfoxide ligands: Syntheses, Structures, Substitution Reactions, and  
Catalysis Ammonia Oxidation Behavior**

Si-Dan Zhong,<sup>a</sup> Shan Zhao,<sup>a</sup> Chen Zhou,<sup>a</sup> Xi Zhang,<sup>a</sup> Zai-Chao Zhang,<sup>b</sup> Piao He,<sup>a</sup> and  
Xiao-Yi Yi<sup>\*a</sup>

<sup>a</sup> College of Chemistry and Chemical Engineering, Hunan Provincial Key Laboratory of Chemical PowerSources, Central South University, Changsha, Hunan 410083, P. R. China.

<sup>b</sup> Jiangsu Key Laboratory for the Chemistry of Low-Dimensional Materials, School of Chemistry and Chemical Engineering, Huaiyin Normal University, Huai'an, Jiangsu 223300, P. R. China.

\* Corresponding authors: Fax: 86 731 888716; Tel: 86 731 88879616;  
E-mail address: [xyyi@csu.edu.cn](mailto:xyyi@csu.edu.cn)

# 1. $^1\text{H}$ NMR, $^{13}\text{C}$ NMR, IR, ESI-MS, UV and Elemental analysis

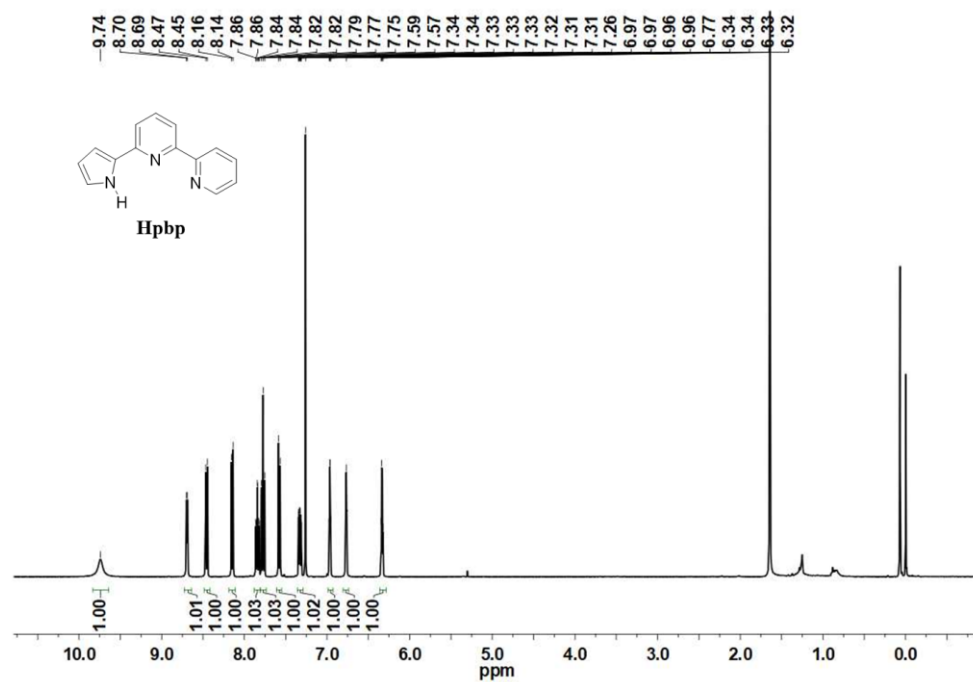

**Fig. S1** |  $^1\text{H}$  NMR (CDCl<sub>3</sub>) spectrum of 6-(1H-pyrrol-2-yl)-2,2'-bipyridine (**Hpbp**).

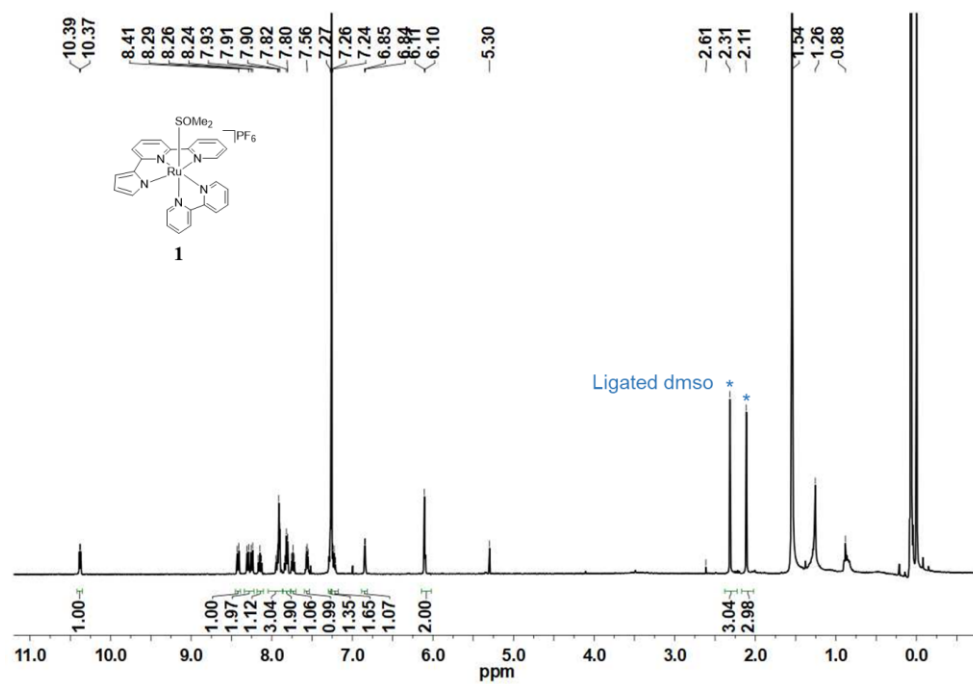

**Fig. S2** |  $^1\text{H}$  NMR (CDCl<sub>3</sub>) spectrum of **1**.

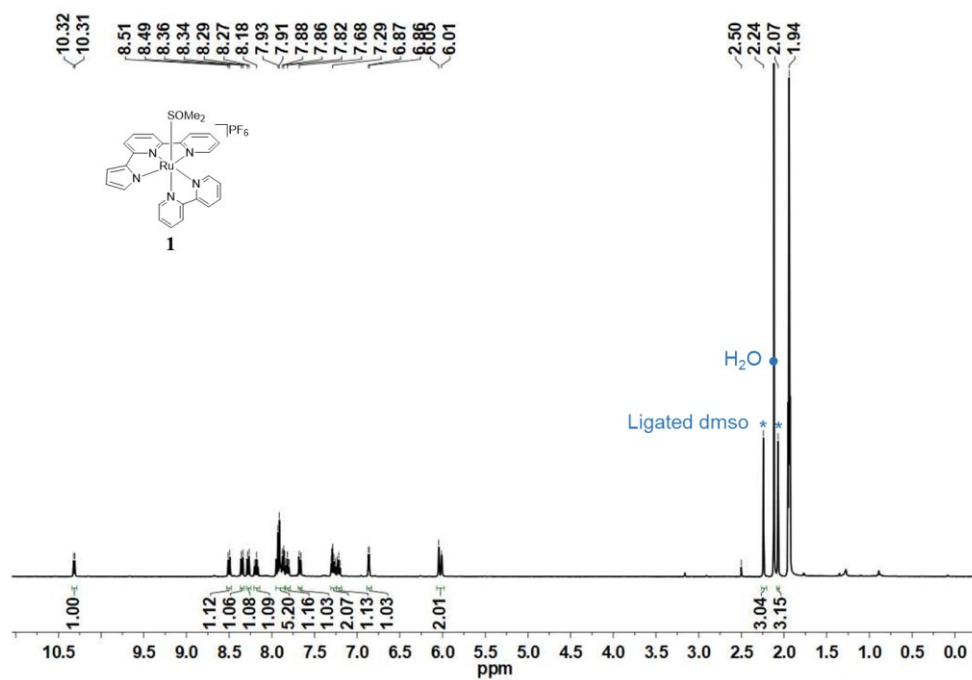

Fig. S3 | <sup>1</sup>H NMR (CD<sub>3</sub>CN) spectrum of **1**.

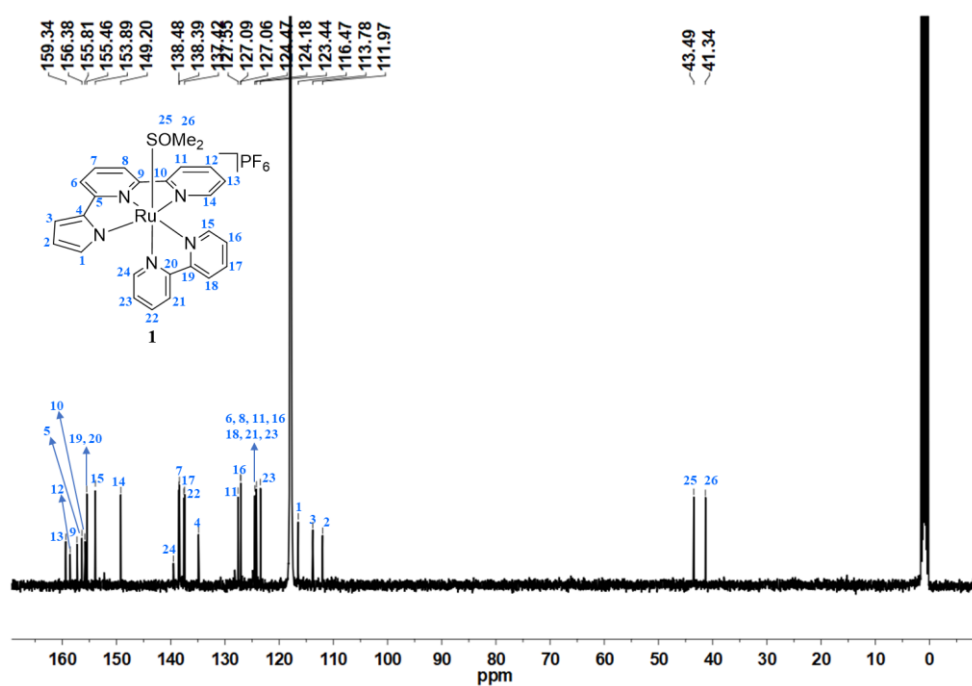

Fig. S4 | <sup>13</sup>C NMR (CD<sub>3</sub>CN) spectrum of **1**.

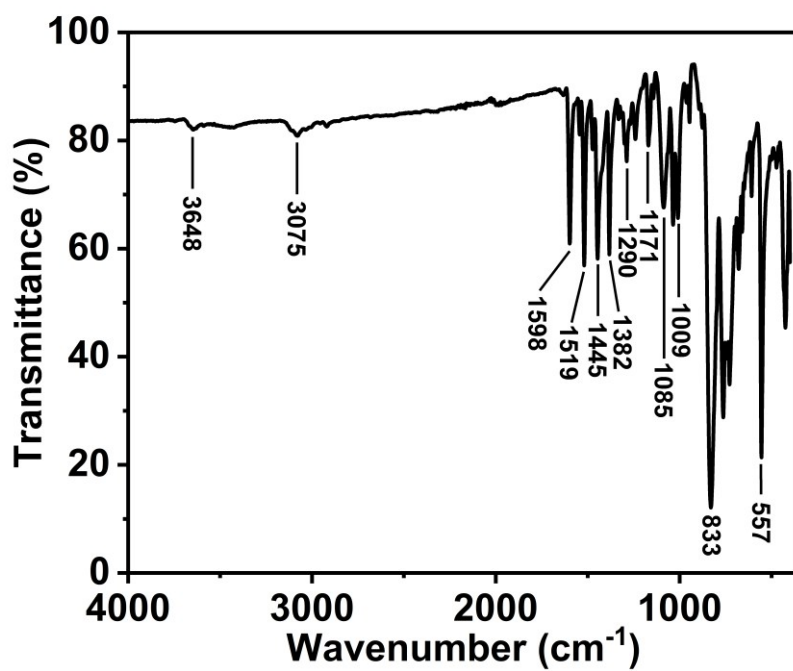

Fig. S5 | IR spectrum of **1**.

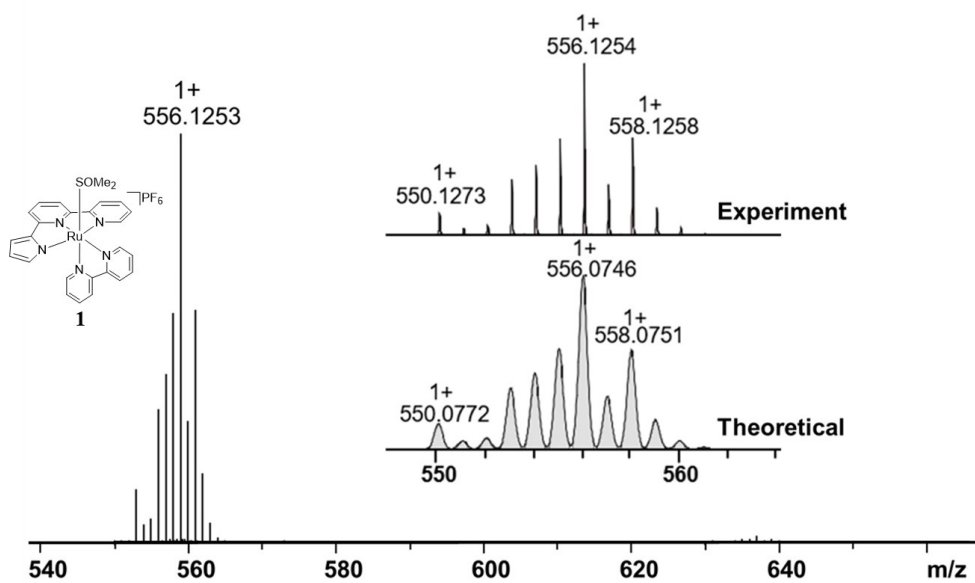

Fig. S6 | ESI-MS spectrum of **1**.

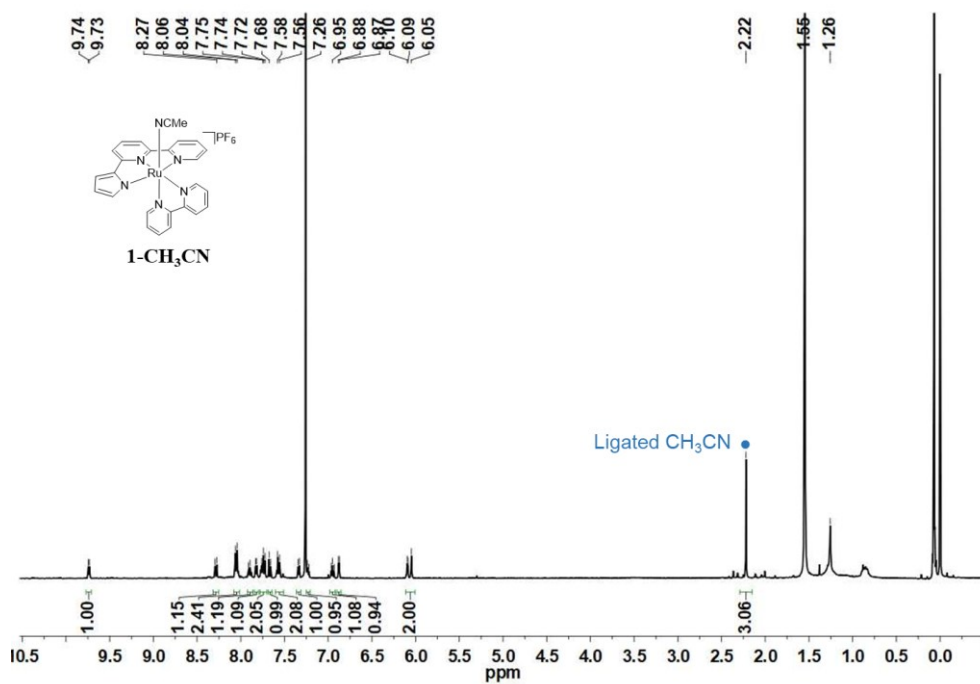

**Fig. S7** | <sup>1</sup>H NMR (CDCl<sub>3</sub>) spectrum of **1-CH<sub>3</sub>CN**.

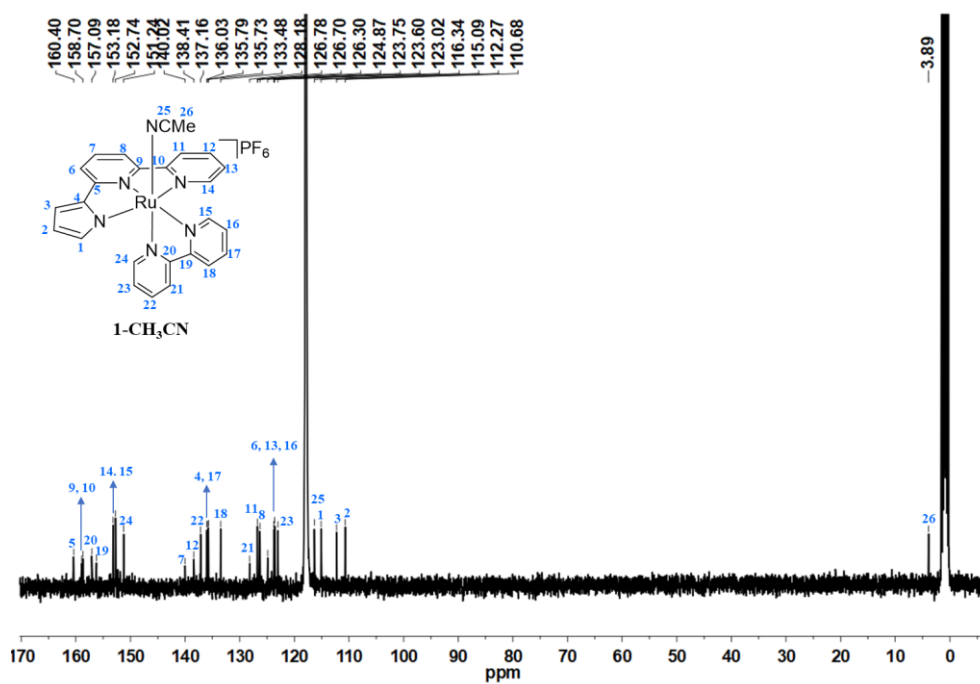

**Fig. S8** | <sup>13</sup>C NMR (CD<sub>3</sub>CN) spectrum of **1-CH<sub>3</sub>CN**.

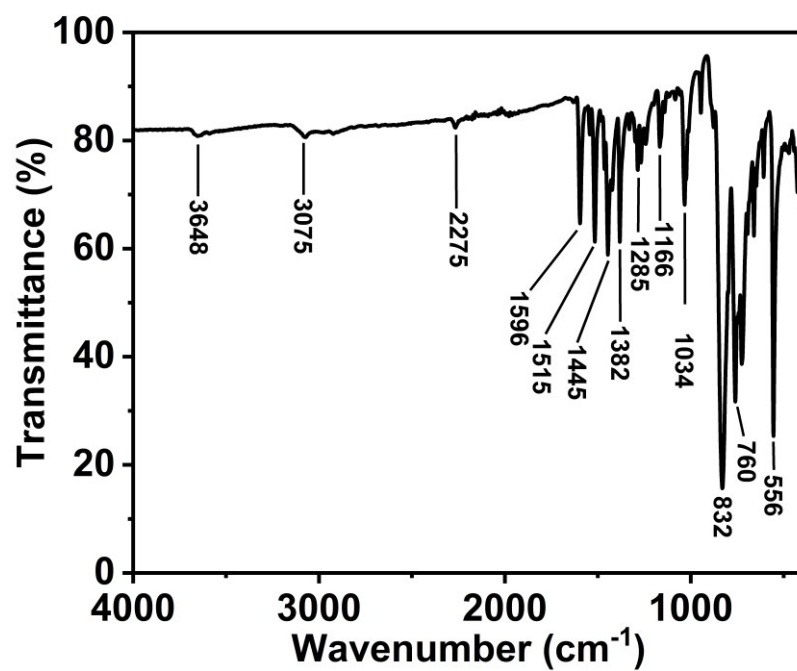

Fig. S9 | IR spectrum of 1-CH<sub>3</sub>CN.

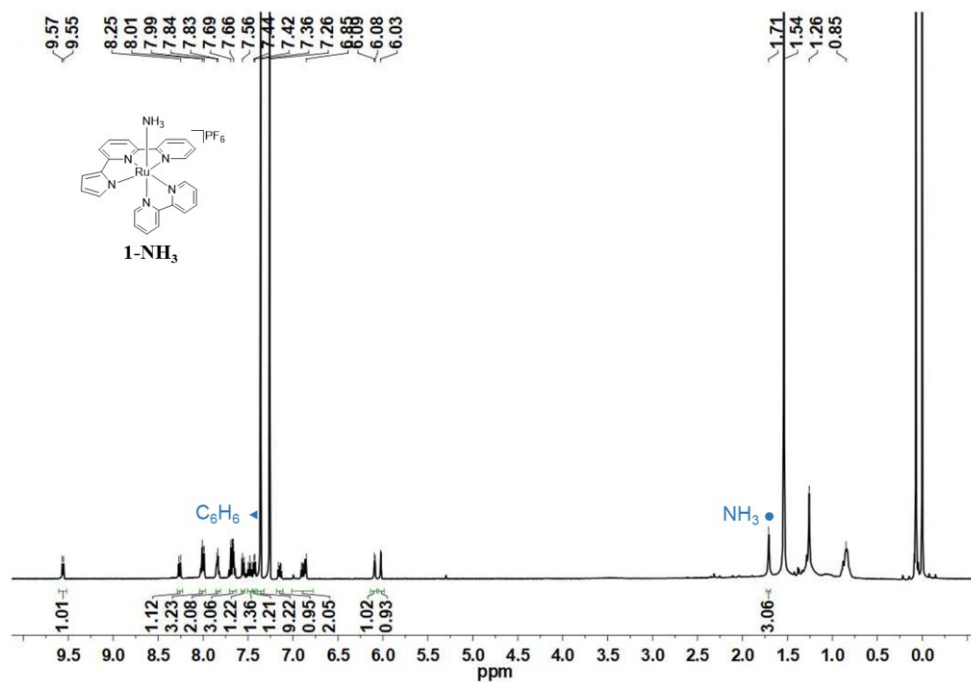

Fig. S10 | <sup>1</sup>H NMR (CDCl<sub>3</sub>) spectrum of 1-NH<sub>3</sub> (signal at δ 7.36 ppm due to the co-crystallized benzene).

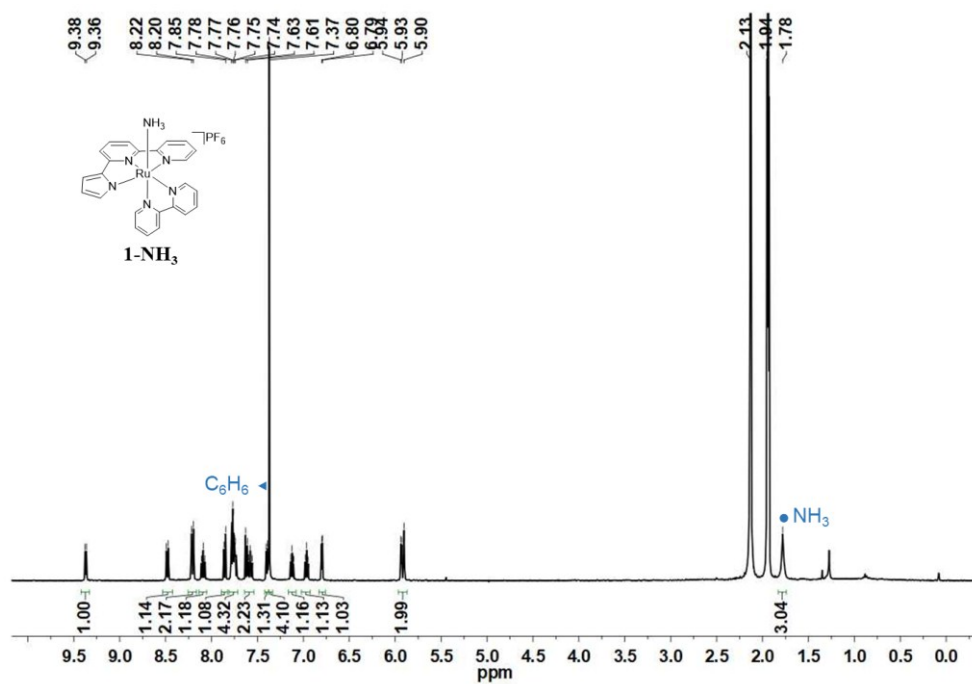

**Fig. S11** | <sup>1</sup>H NMR (CD<sub>3</sub>CN) spectrum of 1-NH<sub>3</sub> (signal at δ 7.37 ppm due to the co-crystallized benzene).

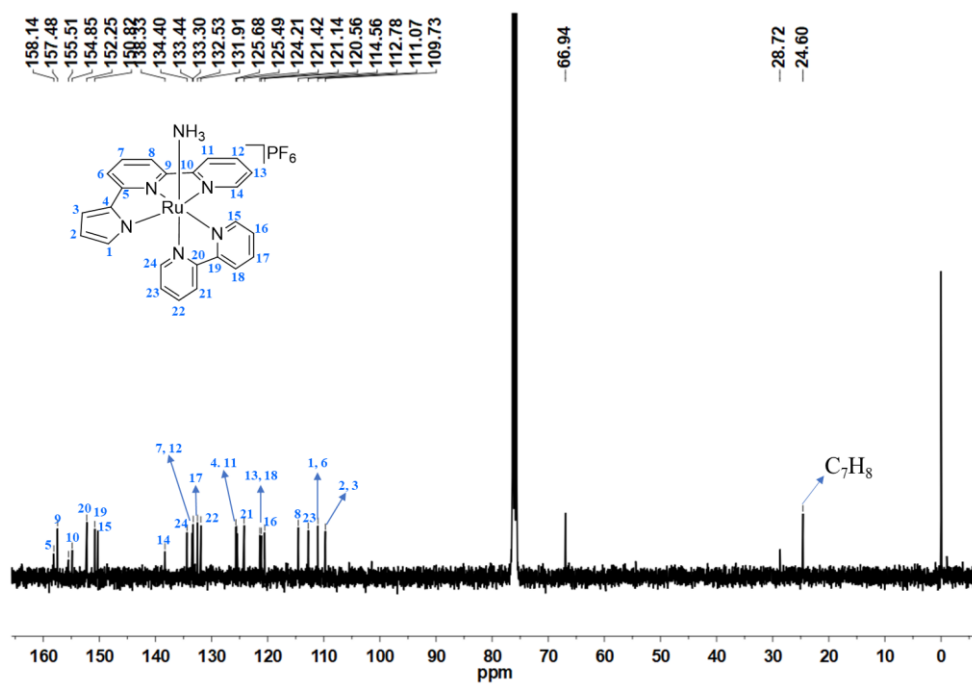

**Fig. S12** | <sup>13</sup>C NMR (CDCl<sub>3</sub>) spectrum of 1-NH<sub>3</sub>.

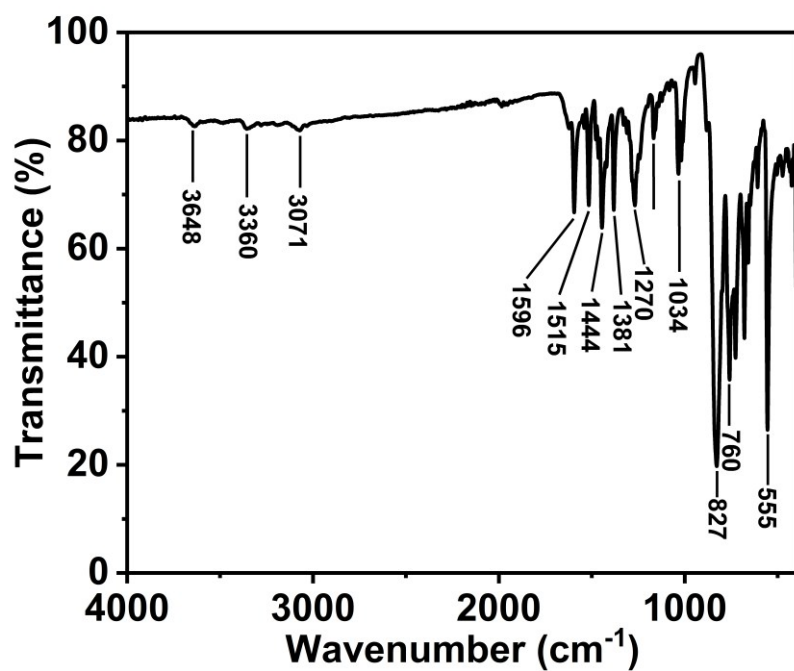

Fig. S13 | IR spectrum of 1-NH<sub>3</sub>.

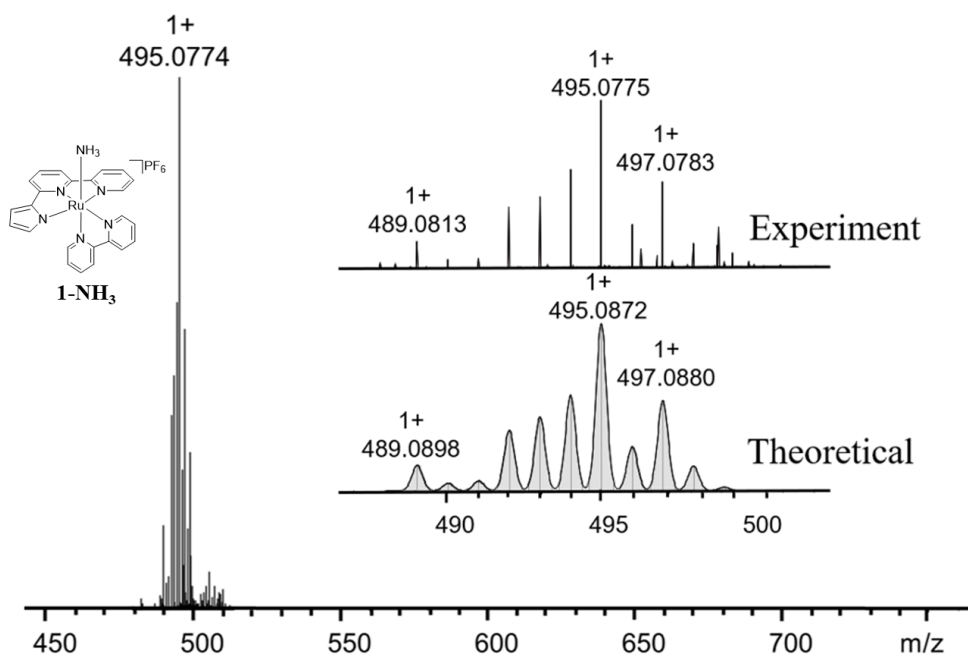

Fig. S14 | ESI-MS spectrum of 1-NH<sub>3</sub>.



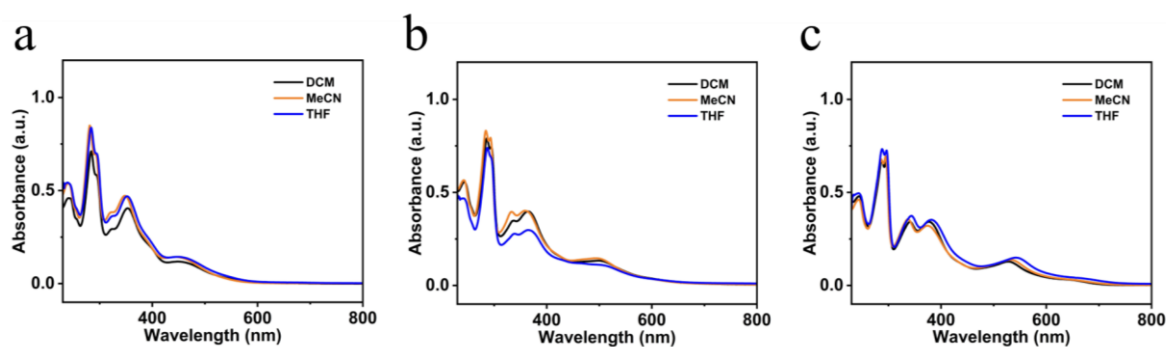

**Fig. S15** | The UV-vis absorption spectra of a) **1**, b) **1-CH<sub>3</sub>CN** and c) **1-NH<sub>3</sub>** in DCM, CH<sub>3</sub>CN or THF solvent.

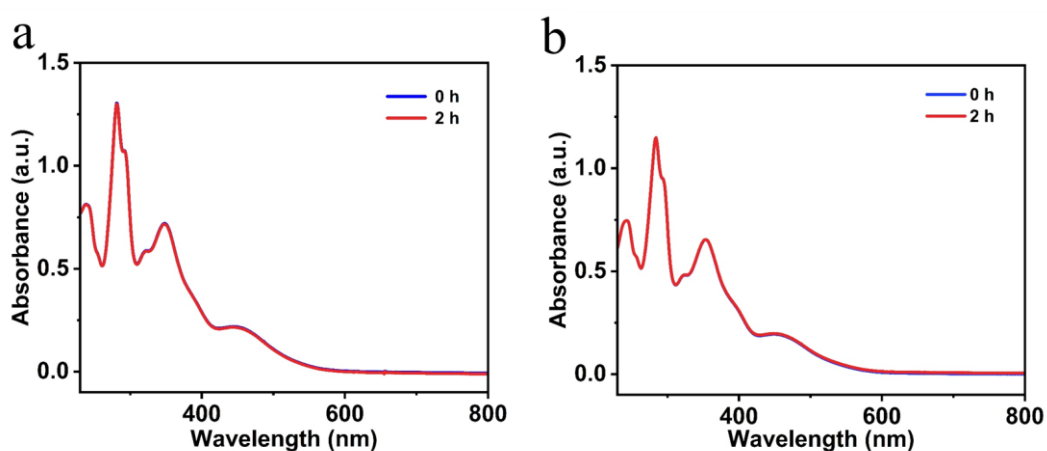

**Fig. S16** | a) The UV-vis spectra change for complex **1** (0.015 mM) into **1-CH<sub>3</sub>CN** in CH<sub>3</sub>CN solvent in natural light (almost no change after 2 h). b) The UV-vis spectra change for complex **1** (0.015 mM) into **1-NH<sub>3</sub>** in CH<sub>2</sub>Cl<sub>2</sub> solvent with 0.2 M NH<sub>3</sub> in natural light (almost no change after 2 h).

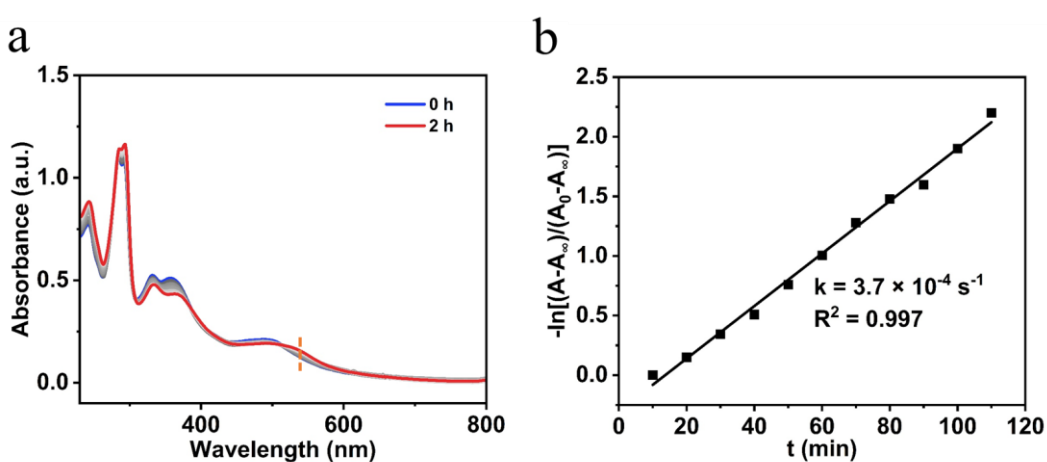

**Fig. S17** | a) The UV-vis spectra change for complex **1-CH<sub>3</sub>CN** (0.015 mM) into **1-NH<sub>3</sub>** in CH<sub>2</sub>Cl<sub>2</sub> solvent with 0.2 M NH<sub>3</sub> in natural light. b) The reaction rate is  $3.7 \times 10^{-4} \text{ s}^{-1}$ .

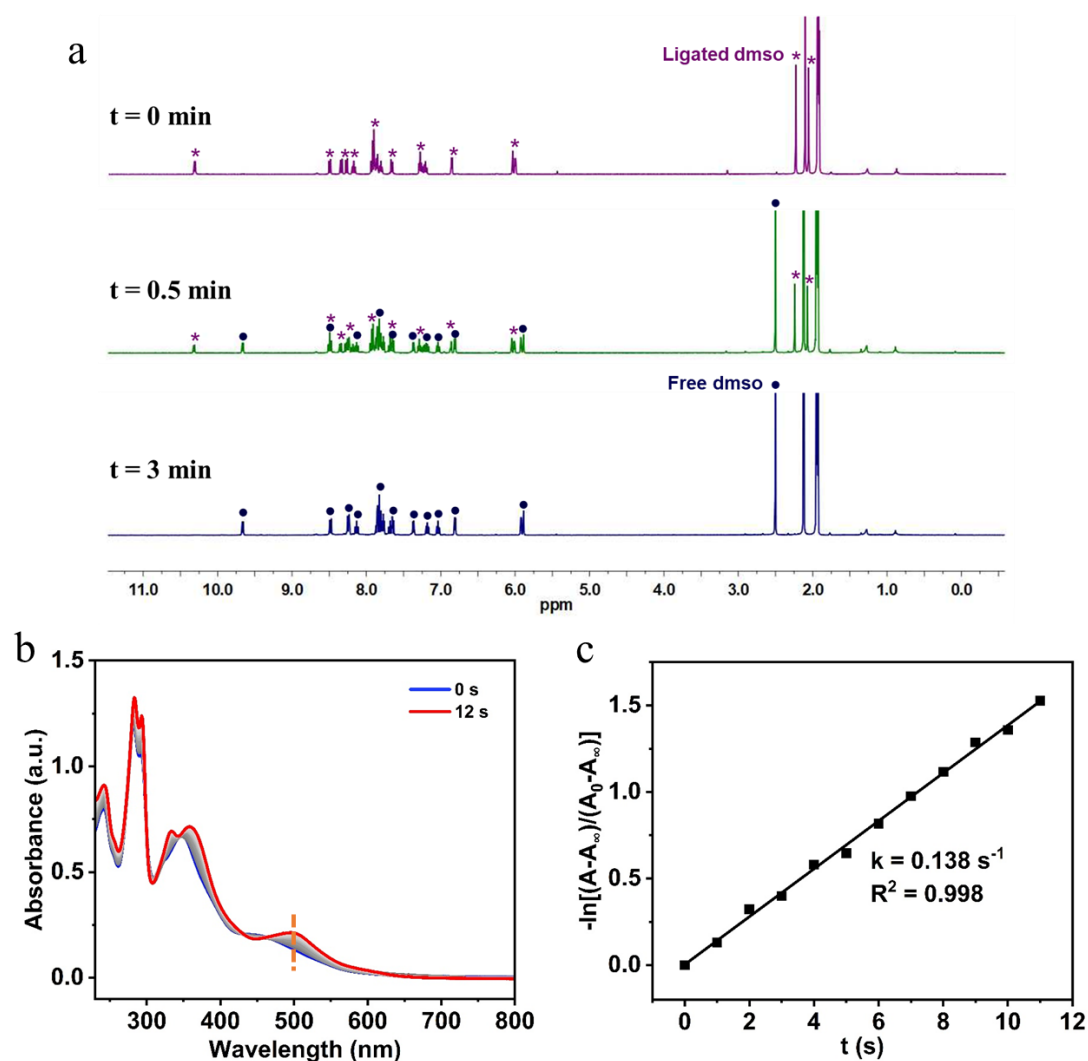

**Fig. S18** | a) The  $^1\text{H}$  NMR ( $\text{CD}_3\text{CN}$ ) monitoring experiment of complex **1** (labeled with \*) into **1-CH<sub>3</sub>CN** (labeled with •) upon irradiation of 300 W Xe lamp. b) The UV-vis spectra change for complex **1** (0.015 mM) into **1-CH<sub>3</sub>CN** in  $\text{CH}_3\text{CN}$  solvent with 0.2 M  $\text{NH}_3$  upon irradiation of 300 W Xe lamp. c) The reaction rate is  $0.138 \text{ s}^{-1}$ .

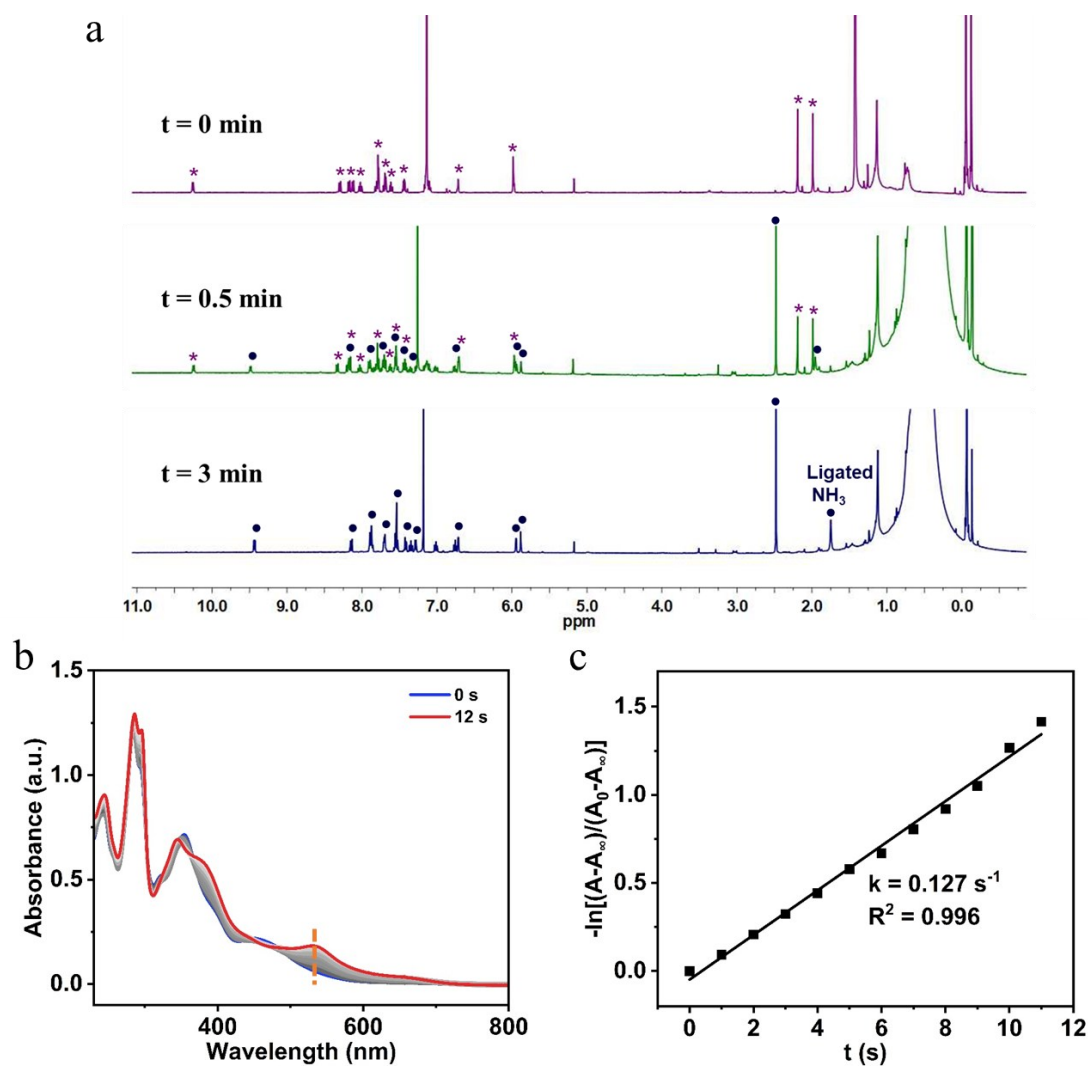

**Fig. S19** | a) The  $^1\text{H}$  NMR ( $\text{CDCl}_3$ ) monitoring experiment of complex **1** (labeled with \*) into **1-NH<sub>3</sub>** (labeled with •) upon irradiation of 300 W Xe lamp. b) The UV-vis spectra change for complex **1** (0.015 mM) into **1-NH<sub>3</sub>** in  $\text{CH}_2\text{Cl}_2$  solvent with 0.2 M  $\text{NH}_3$  upon irradiation of 300 W Xe lamp. c) The reaction rate is  $0.127\text{ s}^{-1}$ .

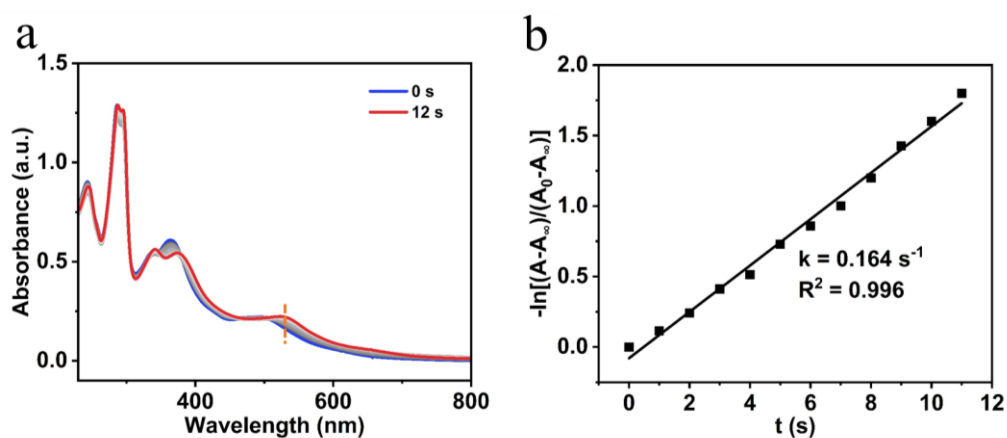

**Fig. S20** | a) The UV-vis spectra change for complex **1-CH<sub>3</sub>CN** (0.015 mM) into **1-NH<sub>3</sub>** in  $\text{CH}_2\text{Cl}_2$  solvent with 0.2 M  $\text{NH}_3$  upon irradiation of 300 W Xe lamp. b) The reaction rate is  $0.164\text{ s}^{-1}$ .

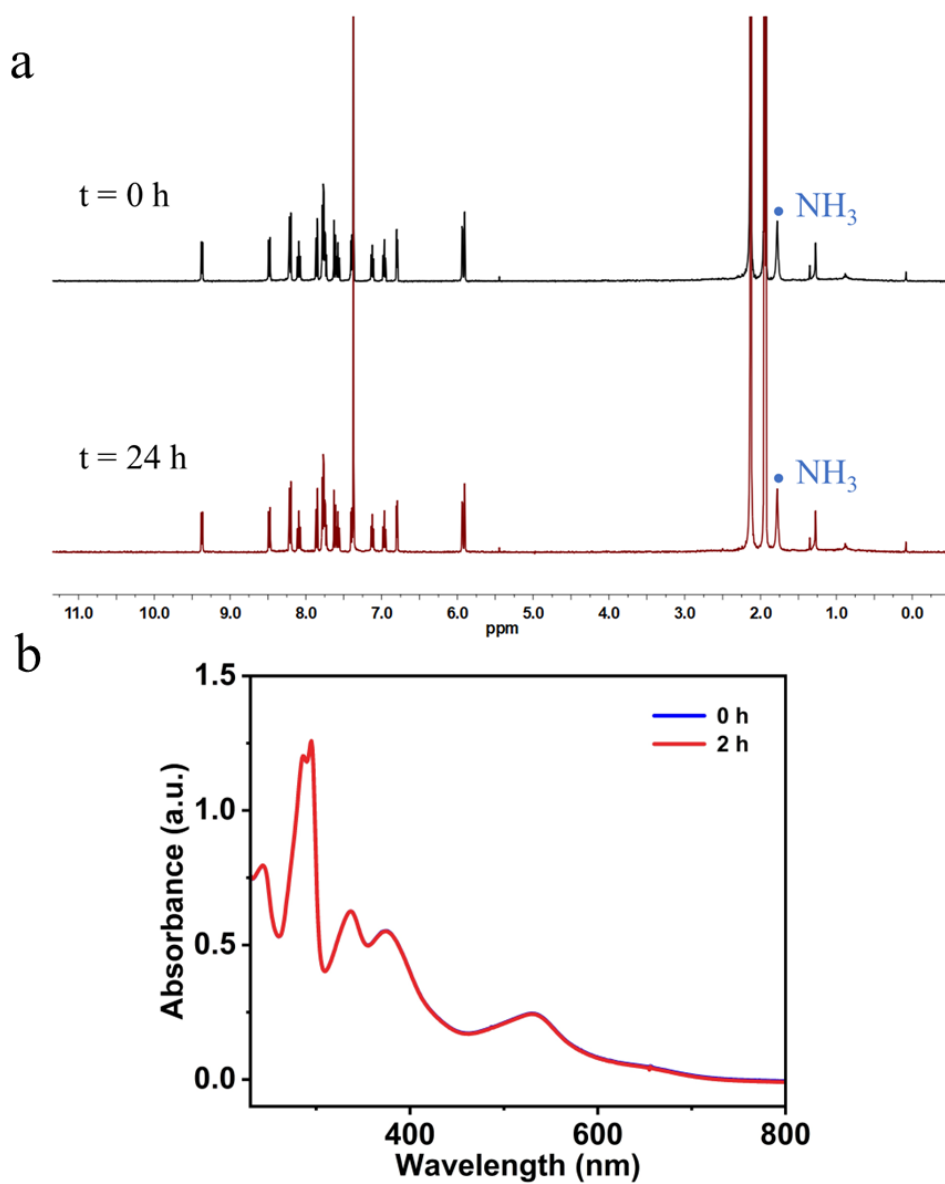

**Fig. S21** | a) The  $^1\text{H}$  NMR ( $\text{CD}_3\text{CN}$ ) monitoring experiment of complex **1-NH<sub>3</sub>** in  $\text{CD}_3\text{CN}$  solvent. b) The UV-vis spectra change for complex **1-NH<sub>3</sub>** in  $\text{CH}_3\text{CN}$  solvent (almost no change after 2 h).

## 2. Crystallographic data

**Table S1** | Crystallographic data of **1**, **1-CH<sub>3</sub>CN** and **1-NH<sub>3</sub>**.

| Compound<br>CCDC                         | <b>1</b><br><b>2428739</b>                                          | <b>1-CH<sub>3</sub>CN</b><br><b>2428742</b>                       | <b>1-NH<sub>3</sub></b><br><b>2428748</b>                                              |
|------------------------------------------|---------------------------------------------------------------------|-------------------------------------------------------------------|----------------------------------------------------------------------------------------|
| Empirical formula                        | C <sub>26</sub> H <sub>24</sub> F <sub>6</sub> N <sub>5</sub> OPRuS | C <sub>26</sub> H <sub>21</sub> F <sub>6</sub> N <sub>6</sub> PRu | C <sub>30</sub> H <sub>27.84</sub> F <sub>6</sub> N <sub>6</sub> O <sub>0.42</sub> PRu |
| Formula weight                           | 705.10                                                              | 663.53                                                            | 725.14                                                                                 |
| Temperature/K                            | 150(2)                                                              | 100(2)                                                            | 153(2)                                                                                 |
| Crystal system                           | tetragonal                                                          | tetragonal                                                        | monoclinic                                                                             |
| Space group/number                       | <i>P</i> 4/ <i>n</i> (85)                                           | <i>I</i> 4/ <i>m</i> (87)                                         | <i>P</i> 2 <sub>1</sub> / <i>c</i> (14)                                                |
| <i>a</i> /Å                              | 16.6299(10)                                                         | 16.6238(3)                                                        | 10.9226(4)                                                                             |
| <i>b</i> /Å                              | 16.6299(10)                                                         | 16.6238(3)                                                        | 25.8025(10)                                                                            |
| <i>c</i> /Å                              | 48.630(6)                                                           | 39.8892(19)                                                       | 10.5737(4)                                                                             |
| <i>α</i> /deg                            | 90                                                                  | 90                                                                | 90                                                                                     |
| <i>β</i> /deg                            | 90                                                                  | 90                                                                | 102.664(4)                                                                             |
| <i>γ</i> /deg                            | 90                                                                  | 90                                                                | 90                                                                                     |
| Volume/(Å <sup>3</sup> )                 | 13449(2)                                                            | 11023.4(7)                                                        | 2907.5(2)                                                                              |
| <i>Z</i>                                 | 8                                                                   | 16                                                                | 4                                                                                      |
| $\rho_{\text{calc}}/(\text{gcm}^{-3})$   | 0.696                                                               | 1.599                                                             | 1.657                                                                                  |
| $\mu/(\text{mm}^{-1})$                   | 0.318                                                               | 0.695                                                             | 0.668                                                                                  |
| <i>F</i> /000                            | 2836                                                                | 5312                                                              | 1465                                                                                   |
| Reflections collected                    | 98648                                                               | 31805                                                             | 21127                                                                                  |
| Independent reflections                  | 11885                                                               | 6105                                                              | 6314                                                                                   |
| <i>R</i> <sub>int</sub>                  | 0.1426                                                              | 0.0873                                                            | 0.0455                                                                                 |
| <i>R</i> <sub>sigma</sub>                | 0.0988                                                              | 0.0791                                                            | 0.0503                                                                                 |
| Data/Restraints/Parameters               | 11885/1289/577                                                      | 6105/4277/752                                                     | 6314/6/416                                                                             |
| Goodness-of-fit on <i>F</i> <sup>2</sup> | 0.995                                                               | 1.198                                                             | 1.015                                                                                  |
| Final <i>R</i> indexes                   | <i>R</i> <sub>1</sub> = 0.0742                                      | <i>R</i> <sub>1</sub> = 0.1100                                    | <i>R</i> <sub>1</sub> = 0.0352                                                         |
| [ <i>I</i> ≥ 2σ( <i>I</i> )]             | w <i>R</i> <sub>2</sub> = 0.1831                                    | w <i>R</i> <sub>2</sub> = 0.2694                                  | w <i>R</i> <sub>2</sub> = 0.0825                                                       |
| Final <i>R</i> indexes                   | <i>R</i> <sub>1</sub> = 0.1120                                      | <i>R</i> <sub>1</sub> = 0.1637                                    | <i>R</i> <sub>1</sub> = 0.0571                                                         |
| [all data]                               | w <i>R</i> <sub>2</sub> = 0.2019                                    | w <i>R</i> <sub>2</sub> = 0.2949                                  | w <i>R</i> <sub>2</sub> = 0.0909                                                       |

$$^a\text{GooF} = [\Sigma w(|F_o| - |F_c|)^2 / (N_{\text{obs}} - N_{\text{param}})]^{1/2}.$$

$$^bR_1 = \Sigma ||F_o| - |F_c|| / \Sigma |F_o|. \quad ^c wR_2 = [(\Sigma w|F_o| - |F_c|)^2 / \Sigma w^2|F_o|^2]^{1/2}.$$

**Table S2** | Bond lengths (Å) and angles (°) of **1**, **1-CH<sub>3</sub>CN** and **1- NH<sub>3</sub>**.

| Compound          | <b>1</b>       | <b>1-CH<sub>3</sub>CN</b> | <b>1-NH<sub>3</sub></b> |
|-------------------|----------------|---------------------------|-------------------------|
| CCDC              | <b>2428739</b> | <b>2428742</b>            | <b>2428748</b>          |
| Bond lengths/Å    |                |                           |                         |
| Ru1–N1(A)         | 2.063(4)       | 2.100(12)                 | 2.057(2)                |
| Ru1–N2(A)         | 1.979(4)       | 1.919(12)                 | 1.977(2)                |
| Ru1–N3(A)         | 2.095(4)       | 2.057(15)                 | 2.072(2)                |
| Ru1–N4(A)         | 2.067(4)       | 1.996(19)                 | 2.072(2)                |
| Ru1–N5(A)         | 2.108(4)       | 2.06(2)                   | 2.025(2)                |
| Ru1–N6(S1A)       | 2.269(17)      | 2.035(8)                  | 2.135(3)                |
| Angle/deg         |                |                           |                         |
| N1(A)–Ru1–N2(A)   | 80.58(17)      | 80.3(5)                   | 79.89(10)               |
| N1(A)–Ru1–N3(A)   | 159.67(16)     | 162.0(6)                  | 157.96(10)              |
| N1(A)–Ru1–N4(A)   | 89.29(15)      | 92.4(9)                   | 99.65(9)                |
| N1(A)–Ru1–N5(A)   | 95.83(15)      | 92.9(10)                  | 93.22(10)               |
| N1(A)–Ru1–N6(S1A) | 94.3(4)        | 91.8(4)                   | 84.85(10)               |
| N2(A)–Ru1–N3(A)   | 79.10(16)      | 81.9(6)                   | 78.53(9)                |
| N2(A)–Ru1–N4(A)   | 93.39(16)      | 97.9(8)                   | 174.10(9)               |
| N2(A)–Ru1–N5(A)   | 170.70(16)     | 172.0(8)                  | 95.63(9)                |
| N2(A)–Ru1–N6(S1A) | 88.9(4)        | 87.5(4)                   | 89.01(10)               |
| N3(A)–Ru1–N4(A)   | 91.23(15)      | 92.7(10)                  | 102.27(9)               |
| N3(A)–Ru1–N5(A)   | 104.15(14)     | 105.0(10)                 | 93.28(9)                |
| N3(A)–Ru1–N6(S1A) | 86.0(5)        | 84.7(6)                   | 90.34(9)                |
| N4(A)–Ru1–N5(A)   | 77.92(15)      | 78.0(10)                  | 78.51(9)                |
| N4(A)–Ru1–N6(S1A) | 176.1(4)       | 173.6(8)                  | 96.81(9)                |
| N5(A)–Ru1–N6(S1A) | 100.0(4)       | 97.0(7)                   | 174.60(9)               |

### 3. Electrochemical studies

#### CV

The typical sealed three-electrode cell was employed, including an Ag/AgNO<sub>3</sub> in 0.1 M AgNO<sub>3</sub> acetonitrile solution, a Pt wire, and a glassy carbon electrode (GCE), which were used as the reference electrode, the counter electrode, and the working electrode, respectively.

In acetonitrile solution, the peak potential of ferrocene relative to Ag/AgNO<sub>3</sub> in cyclic voltammetry chronoamperometry test is 0.05 V. In dichloromethane solution, the peak potential of ferrocene relative to Ag/AgNO<sub>3</sub> in cyclic voltammetry chronoamperometry test is 0.105 V.

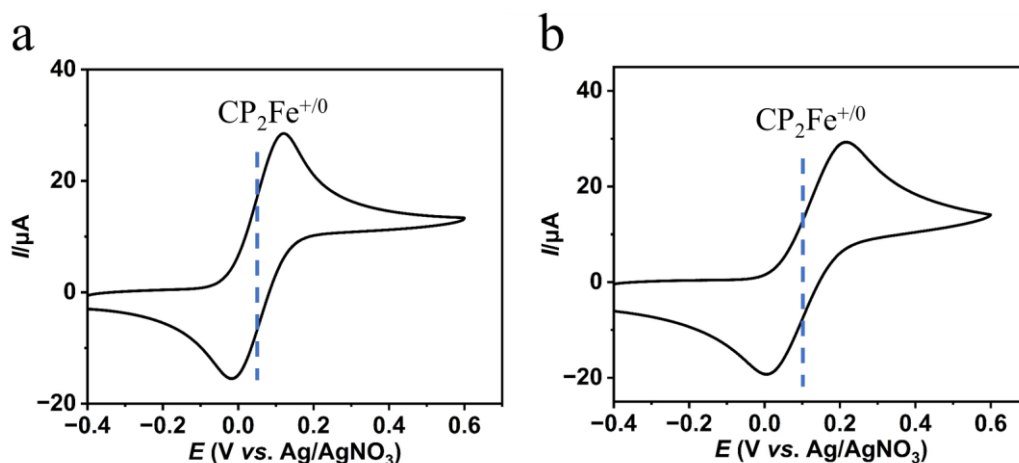

**Fig. S22** | The CV of ferrocene as internal standard in a) CH<sub>3</sub>CN or b) CH<sub>2</sub>Cl<sub>2</sub> solution with scan rate at 100 mV s<sup>-1</sup>.

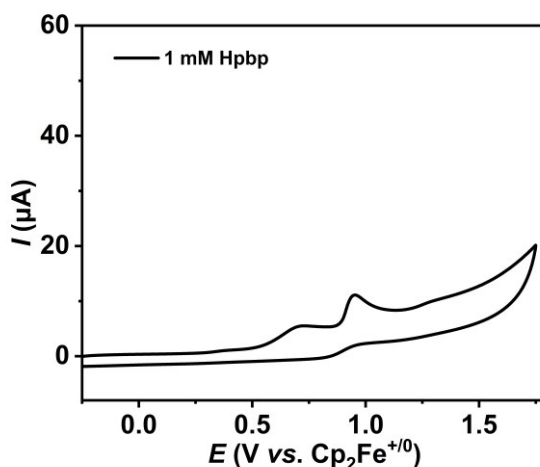

**Fig. S23** | The CV of 1mM Hpbp in CH<sub>3</sub>CN solution with scan rate at 100 mV s<sup>-1</sup>.

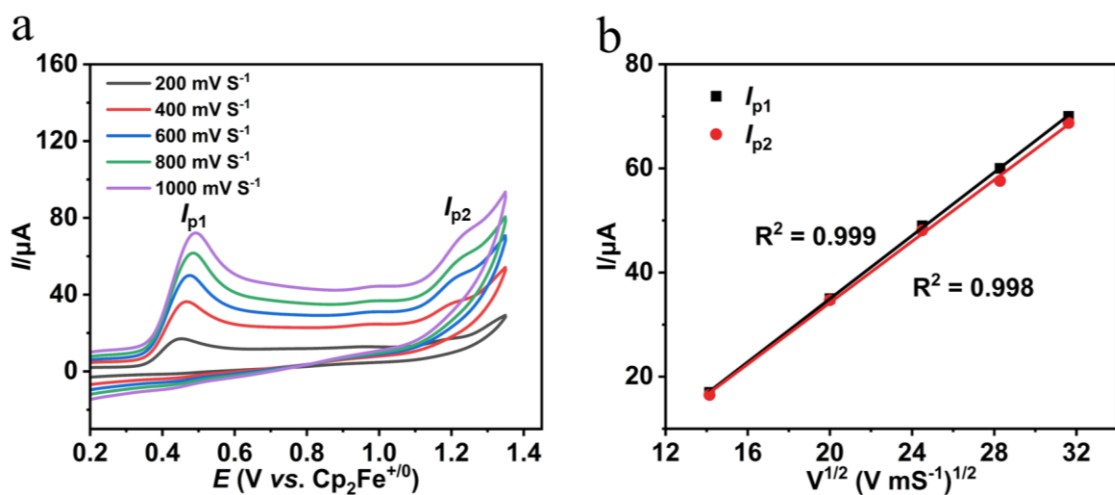

**Fig. S24** | CVs of 1 mM complex of a) **1** solution in CH<sub>3</sub>CN solution with scan rate at 200, 400, 600, 800, 1000 mV s<sup>-1</sup> and b) plot of  $I_p$  vs.  $v^{1/2}$ .

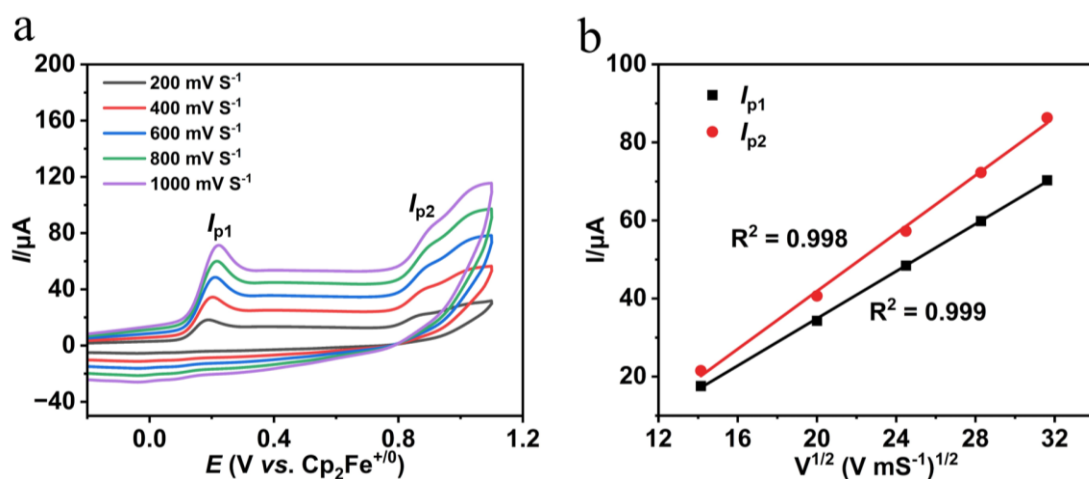

**Fig. S25** | CVs of 1 mM complex of a) **1-CH<sub>3</sub>CN** solution in CH<sub>3</sub>CN solution with scan rate at 200, 400, 600, 800, 1000 mV s<sup>-1</sup> and b) plot of  $I_p$  vs.  $v^{1/2}$ .

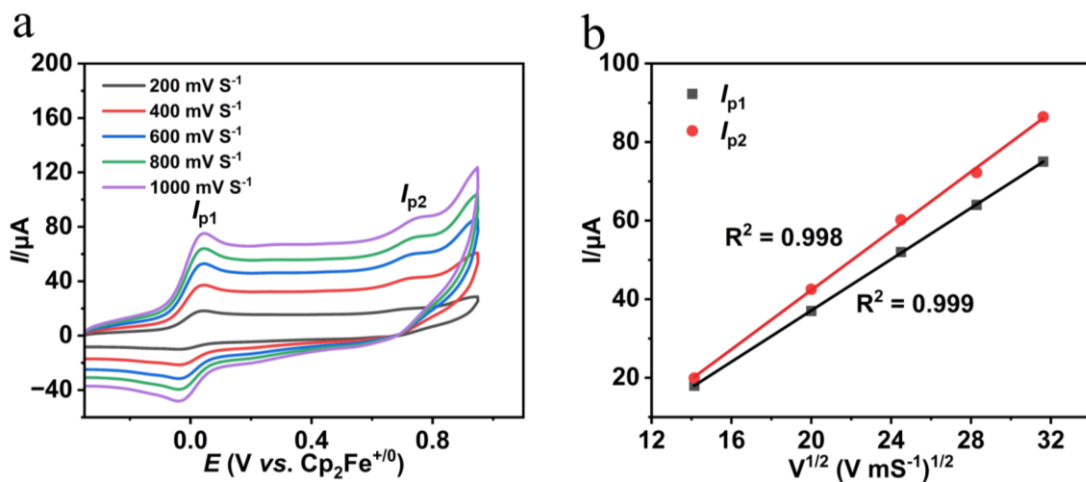

**Fig. S26** | CVs of 1 mM complex of a) **1-NH<sub>3</sub>** solution in CH<sub>3</sub>CN solution with scan rate at 200, 400, 600, 800, 1000 mV s<sup>-1</sup> and b) plot of  $I_p$  vs.  $v^{1/2}$ .



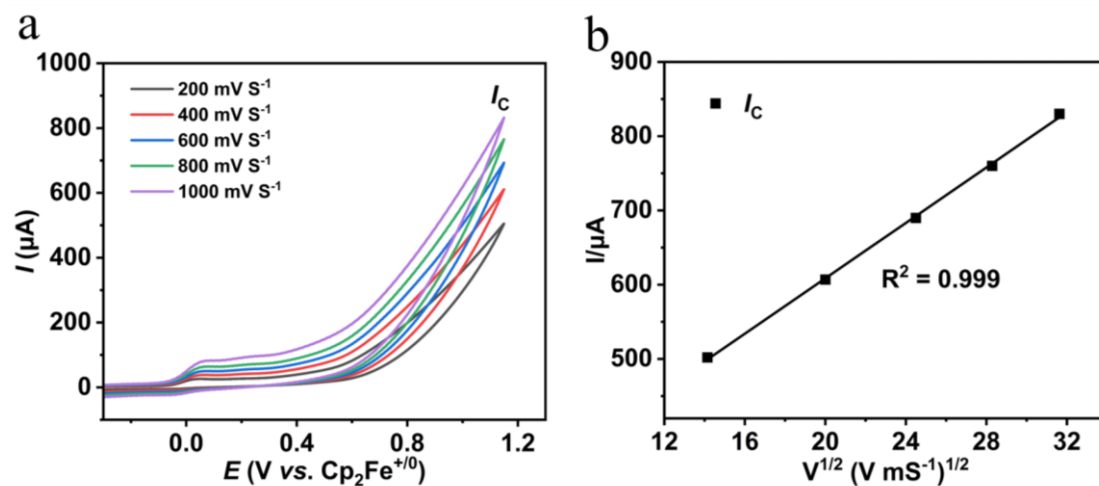

**Fig. S27** | a) CVs of 1 mM 1-NH<sub>3</sub> in presence of 0.20 M NH<sub>3</sub> in CH<sub>3</sub>CN solution with scan rate at 200, 400, 600, 800, 1000 mV s<sup>-1</sup>; b) Plot of  $I_c$  vs.  $v^{1/2}$ .

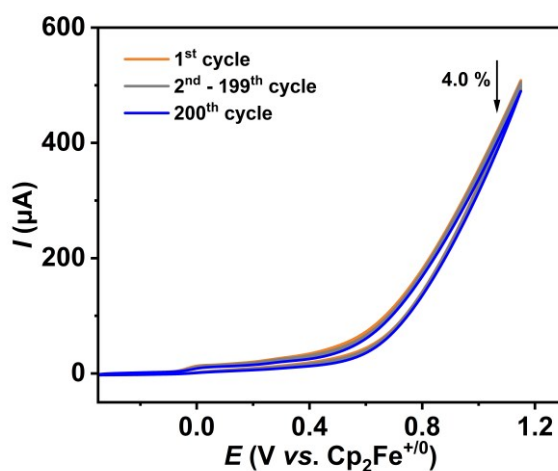

**Fig. S28** | Cycling stability of 1 mM 1-NH<sub>3</sub> in presence of 0.20 M NH<sub>3</sub> in CH<sub>3</sub>CN solution with scan rate at 100 mV s<sup>-1</sup>.

**Table. S3** | Formulas used for the calculation of rate (k) and equilibrium (K) constants.

| Equations                                                                                                                                                                                  | Description of parameters                                                                                                                                                                                                                           |
|--------------------------------------------------------------------------------------------------------------------------------------------------------------------------------------------|-----------------------------------------------------------------------------------------------------------------------------------------------------------------------------------------------------------------------------------------------------|
| $\frac{I_{c1}}{I_{c2}} = a \cdot \frac{1}{v} + K_{O-S}^{III}$ <p>(eq. 1)</p>                                                                                                               | $I_c$ = cathodic peak intensity (A)<br>$a = RT/nF$ , with:<br>R = Boltzmann constant (J/(K·mol))<br>T = temperature (K)<br>n = number of exchanged electrons<br>F = Faraday constant (A·s/mol)<br>$v$ = scan rate (V/s)<br>K = equilibrium constant |
| $\sqrt{v} = \frac{1}{\frac{0.471}{K_{O-S}^{III}} \cdot \sqrt{\frac{nFl}{RT}}} \cdot \frac{I_d}{I_k} - \frac{1.02}{\frac{0.471}{K_{O-S}^{III}} \cdot \sqrt{\frac{nFl}{RT}}}$ <p>(eq. 2)</p> | $I_d$ = diffusional current in the absence of a chemical reaction (= $I_{a1}$ )<br>$I_k$ = measured peak current (= $I_{c1}$ )<br>$l = k_{O-S}^{II} + k_{O-S}^{III}$                                                                                |
| $K^{II} = K^{III} + e^{\frac{F}{RT}(E_{Ru-S}^0 - E_{Ru-O}^0)}$ <p>(eq. 3)</p>                                                                                                              | $E^0$ = standard potential                                                                                                                                                                                                                          |
| $\ln\left(\frac{I_{a1}}{\sqrt{v}}\right) = k_{O-S}^{II} \cdot \frac{1}{v} + b$ <p>(eq. 4)</p>                                                                                              |                                                                                                                                                                                                                                                     |

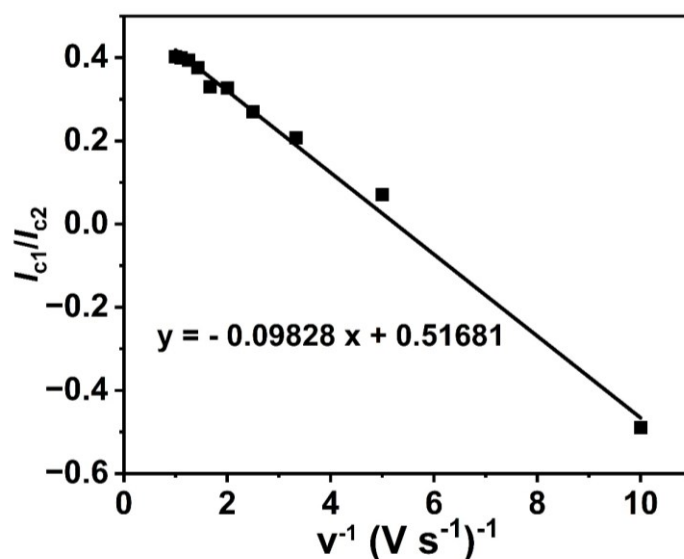**Fig. S29** | Plot of  $I_{c1}/I_{c2}$  vs.  $1/v$  to obtain  $K_{O-S}^{III}$  for 1.

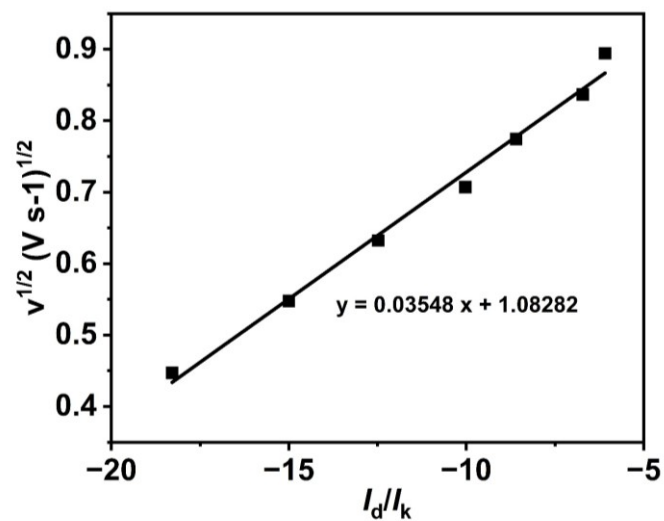

**Fig. S30** | Plot of  $v^{1/2}$  vs.  $I_d/I_k$  to obtain  $k_{O-S}^{III}$  for 1.

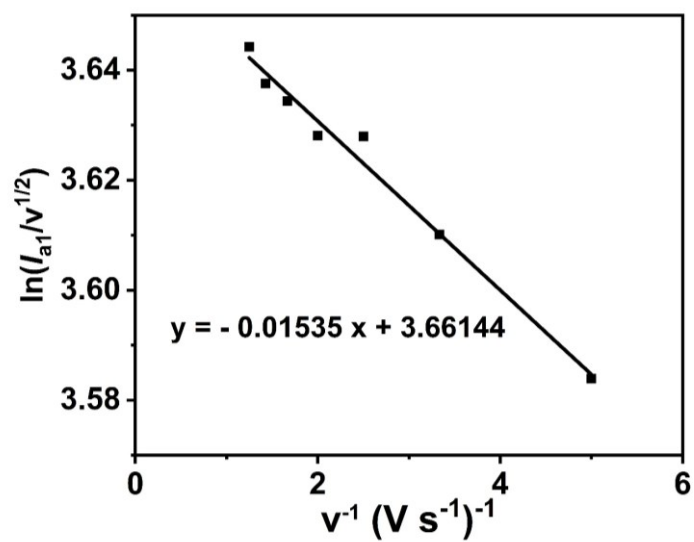

**Fig. S31** | Plot of  $\ln(I_{a1}/v^{1/2})$  vs.  $1/v$  to obtain  $k_{O-S}^{II}$  for 1.

## CPC

### Controlled potential coulometry (CPC) measurements.

The carbon cloth ( $A = 1 \text{ cm}^2$ ), the platinum plate, and the Ag/AgNO<sub>3</sub> in 0.1 M AgNO<sub>3</sub> acetonitrile solution were used as the working electrode, counter electrode, and reference electrode, respectively. Unless mentioned otherwise, The CPC experiments were performed in a sealed electrolytic cell (178 mL) under an Ar atmosphere at a given potential (0.1 V or 0.8 V vs. Cp<sub>2</sub>Fe<sup>+0</sup>) with catalyst (0.01 mM), 0.1 M Bu<sub>4</sub>NPF<sub>6</sub> as supporting electrolytes and saturated NH<sub>3</sub> solution (2.0 M) in CH<sub>3</sub>CN solution.

#### The determination of turnover number (TON):

$$TON = \frac{n}{n_{cat}} \text{ (eq. 5)}$$

$n$  is the amount of the products generated by electrocatalytic ammonia oxidation;  $n_{cat}$  is the amount of the catalyst involved in electrocatalytic ammonia oxidation.

#### The determination of faradaic efficiency (FE):

$$FE = \frac{n_{cat}mF}{it} \times 100\% \text{ (eq. 6)}$$

$n_{cat}$  is the electron transfer number per NH<sub>3</sub> for the ammonia oxidation reaction;  $m$  (mol) is the number of moles of the generated product;  $F$  is the Faraday constant;  $i$  (A) is the current;  $t$  (s) is the electrolysis reaction time.

#### The determination of N<sub>2</sub>H<sub>4</sub> selectivity:

$$Selectivity = \frac{n_{N_2H_4}}{n_{N_2H_4} + n_{N_2}} \times 100\% \text{ (eq. 7)}$$

$n_{N_2H_4}$  and  $n_{N_2}$  are the amount of N<sub>2</sub>H<sub>4</sub> and N<sub>2</sub> after electrolysis, respectively.

**Table S4** | The electrocatalytic performances of background. <sup>a</sup>

| Entry | Catalyst | $E_{app}^b$<br>(V vs. Cp <sub>2</sub> Fe <sup>+0</sup> ) | Time<br>(h) | n <sub>H2</sub><br>(μmol) | n <sub>N2</sub><br>(μmol) | n <sub>N2H4</sub><br>(μmol) |
|-------|----------|----------------------------------------------------------|-------------|---------------------------|---------------------------|-----------------------------|
| 1     | -        | 0.1                                                      | 24          | -                         | -                         | -                           |
| 2     | -        | 0.8                                                      | 2           | 104.6                     | 11.2                      | 70.7                        |

<sup>a</sup> conditions: carbon cloth (1 cm<sup>2</sup>) as working electrode, platinum plate (1 cm<sup>2</sup>) as counter electrode, AgNO<sub>3</sub>/Ag in 0.1 M AgNO<sub>3</sub> acetonitrile solution as reference electrode, 0.1 M Bu<sub>4</sub>NPF<sub>6</sub> as supporting electrolytes, [NH<sub>3</sub>] = 2 M, <sup>b</sup>  $E_{app}$  vs. Cp<sub>2</sub>Fe<sup>+0</sup>.

### Gas Chromatography (GC) methods.

Gas quantification was performed using a molecular sieve column attached to a thermal conductivity detector. Ar was used as the carrier gas.

The standard curves for H<sub>2</sub>, N<sub>2</sub>, and O<sub>2</sub> were created by directly injecting different volumes (100, 200, 300, 400, 500  $\mu$ L) of standard gases. The concentrations of H<sub>2</sub>, N<sub>2</sub>, and O<sub>2</sub> in the standard gases were 2503.8, 406.3, and 98.8 ppm, respectively.

The standard gas at the headspace of reactor was manually injected to the GC using a gastight syringe (SGE Analytical Science). The linear regression equation of H<sub>2</sub> is  $y = 260733.9x - 60.8$  with  $R^2 = 0.998$ . The linear regression equation of N<sub>2</sub> is  $y = 47358.1x + 125.3$  with  $R^2 = 0.993$ . The linear regression equation of O<sub>2</sub> is  $y = 58947.4x + 44.8$  with  $R^2 = 0.963$ . The GC calibration curves H<sub>2</sub>, N<sub>2</sub> and O<sub>2</sub> are shown in Fig. S32.

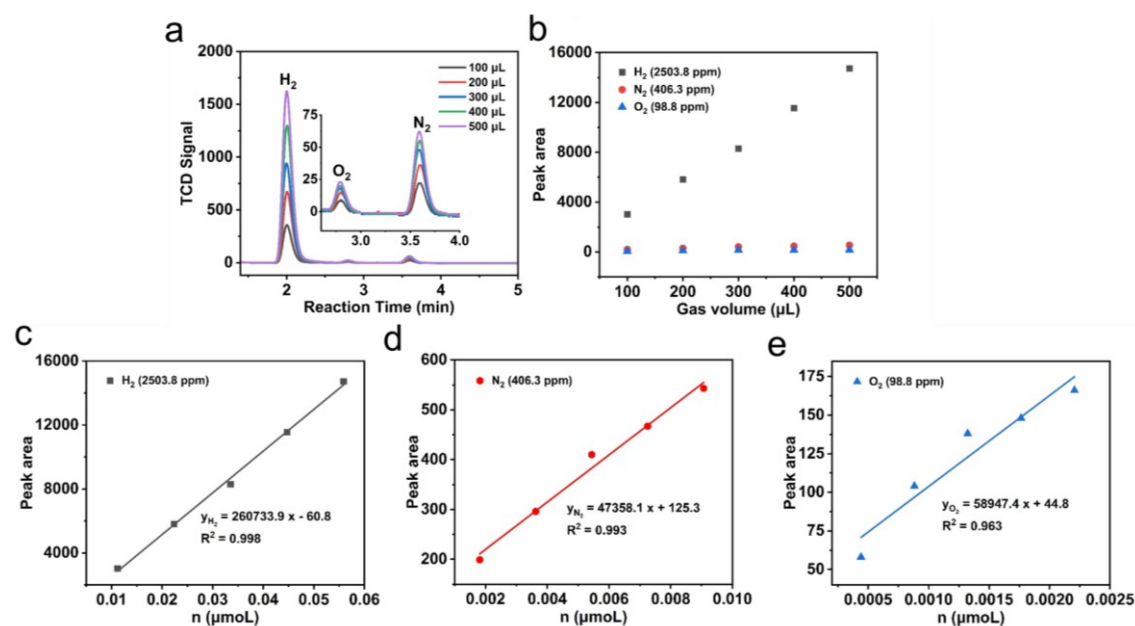

**Fig. S32** | Representative a) GC-TCD trace and b) the corresponding peak area of H<sub>2</sub>, N<sub>2</sub>, and O<sub>2</sub> for standard gases of different volumes (100, 200, 300, 400, 500  $\mu$ L) and Gas Chromatography calibration lines for c) H<sub>2</sub>, d) N<sub>2</sub> and e) O<sub>2</sub>.

### N<sub>2</sub>H<sub>4</sub> Test.

**Preparation of hydrazine standard solution (1.00  $\mu$ g/mL):** Weigh 0.0406 g (containing 0.01g N<sub>2</sub>H<sub>4</sub>) of hydrazine sulfate (N<sub>2</sub>H<sub>4</sub>•H<sub>2</sub>SO<sub>4</sub>), dissolve with 1 M HCl solution, transfer quantitatively to a 100 mL volumetric flask, and dilute to the standard line. Transfer 1 mL of the above solution to a 100 mL volumetric flask and dilute with 1 M HCl solution to the standard line to obtain 1.00  $\mu$ g/mL hydrazine standard solution.

**Preparation of color reagent:** The color reagent was prepared by weighing 4 g of *p*-C<sub>9</sub>H<sub>11</sub>NO dissolved in 200 mL 95% ethanol and 20 mL 37% HCl.

**Calibration curve of hydrazine:** Eight 10 mL colorimetric tubes were prepared by adding 0, 0.2, 0.4, 0.8, 1.6, 2.4, 3.2, and 4.0 mL of hydrazine standard solution, followed by 4 mL of color reagent. Each solution was then diluted to the 10 mL mark with deionized water. The concentration of hydrazine in the eight centrifuge tubes is 0, 0.625, 1.25, 2.5, 5.0, 7.5, 10.0, 12.5  $\mu$ mol/L respectively. After thorough mixing, the solutions were left to stand at room temperature for 1 hour,

protected from light. Absorbance was measured at 458 nm using a cuvette with a 10 mm light path. A concentration-absorbance calibration curve was plotted, with hydrazine content as the abscissa (x-axis) and absorbance as the ordinate (y-axis). The linear regression equation of  $\text{N}_2\text{H}_4$  is  $y = 0.06472x + 0.02566$  with  $R^2 = 0.999$ . (Fig. S33)

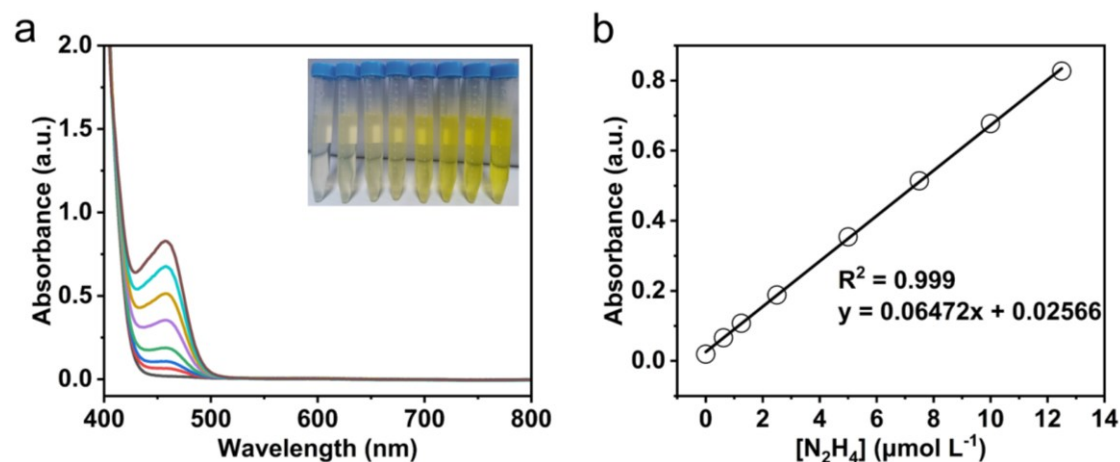

**Fig. S33** | Calibration curve used for calculation of  $\text{N}_2\text{H}_4$  concentrations.

#### Effect of electrolyte $\text{Bu}_4\text{NPF}_6$ on the detection of hydrazine:

**a)** 0, 7.7 mg of tetrabutylammonium hexafluorophosphate ( $\text{Bu}_4\text{NPF}_6$ ) was added into 10 mL colorimetric tubes respectively, 4 mL of color reagent was added to each for color reaction, deionized water was added to dilute to 10 mL (at this time, the concentrations of  $\text{Bu}_4\text{NPF}_6$  in the centrifugal tubes were 0 mM and 2.0 mM, respectively), and waited for 1 hour to perform UV test. The UV showed that the introduction of the  $\text{Bu}_4\text{NPF}_6$  did not produce an  $\text{N}_2\text{H}_4$  signal peak.

**b)** 0, 7.7 mg of  $\text{Bu}_4\text{NPF}_6$  was added into 10 mL centrifuge tubes respectively, 2.4 mL of  $1 \mu\text{g L}^{-1}$   $\text{N}_2\text{H}_4$  standard solution and 4 mL of color reagent were added for the color reaction, and then deionized water was added to dilute to 10 mL (at this time, the concentrations of  $\text{Bu}_4\text{NPF}_6$  in the centrifuge tubes were 0 mM and 2.0 mM, respectively; the concentration of  $\text{N}_2\text{H}_4$  was  $7.5 \mu\text{M}$ ) and the UV test was carried out after a 1 hour wait. The UV showed that the introduction of the  $\text{Bu}_4\text{NPF}_6$  did not produce the  $\text{N}_2\text{H}_4$  signal peak.

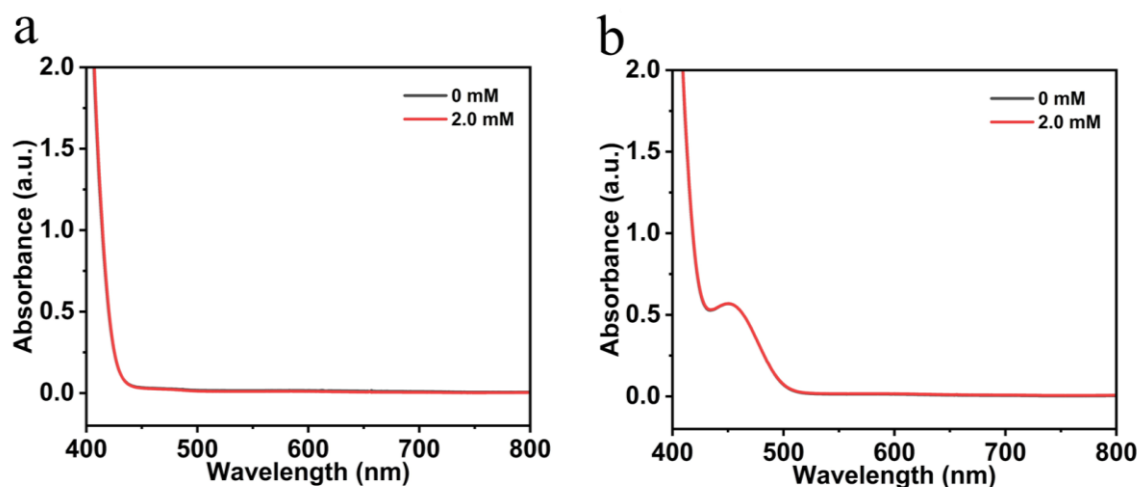

**Fig. S34** | The UV-Vis spectrum of  $\text{Bu}_4\text{NPF}_6$  effect on detection of hydrazine.

### NO<sub>2</sub><sup>-</sup> Test.

**Preparation of nitrite standard solution (20.0 μM):** Nitrite standard solutions were prepared by dissolving 69.0 mg (1 mmol) of NaNO<sub>2</sub> in 100 mL of deionized water. The resulting 10 mM NaNO<sub>2</sub> solution was further diluted with deionized water to give solutions of 20.0 μM.

**Preparation of color reagent:** Color reagent **A** (1.0 mM) was prepared by dissolving sulfanilamide (17.2 mg, 0.1 mmol) in 5 mL of 37% HCl, then diluting the solution to 100 mL with deionized water. Color reagent **B** (1.0 mM) was prepared by dissolving 1-naphthylamine (14.3 mg, 0.1 mmol) in 5 mL of 37% HCl and then diluting the solution to 100 mL with deionized water. Reagents **A** and **B** were stored in the dark at room temperature.

**Calibration curve:** For the nitrite standard curve, 0, 2.0, 4.0, 6.0 and 8.0 mL of as-prepared nitrite standard solutions (NaNO<sub>2</sub> aqueous solution) were transferred to different colorimetric tubes. Reagent **A** (1 mL) and reagent **B** (1 mL) were added to the colorimetric tubes and diluted to 10 mL. The mixtures were well shaken and allowed to stand for 5 min at room temperature before being analysed by UV-vis spectroscopy with a characteristic absorption band at 518.0 nm.

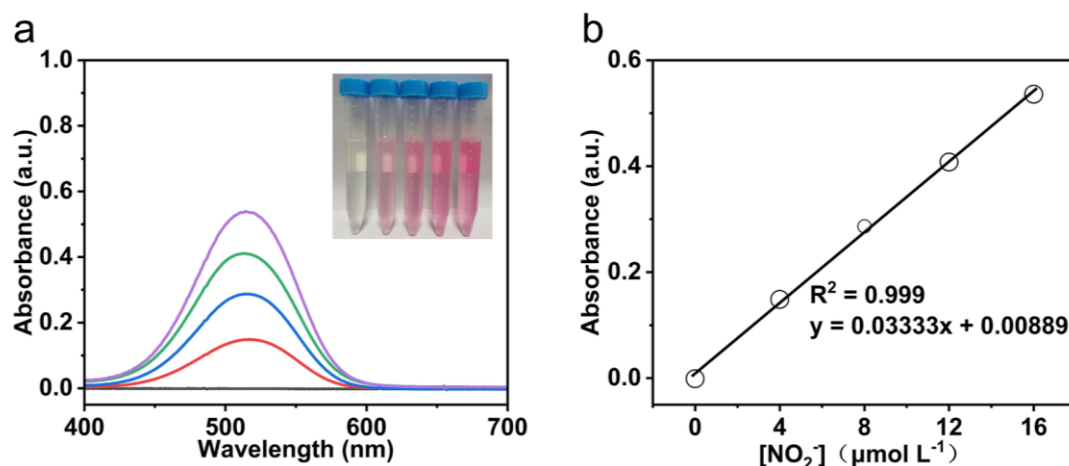

Fig. S35 | Calibration curve used for calculation of NO<sub>2</sub><sup>-</sup> concentrations.

### $\text{NO}_3^-$ Test.

**Preparation of nitrite standard solution (2.0 mM):** A nitrate standard solution was prepared by dissolving 8.5 mg (0.1 mmol) of  $\text{NaNO}_3$  in 50 mL of deionized water.

**Preparation of color reagent (2.0 mM):** An ammonium sulfamate solution (2.0 mM) was prepared by dissolving 22.8 mg (0.2 mmol) of ammonium sulfamate in 5 mL of 37% HCl. This was then diluted to 100 mL with deionized water.

**Calibration curve:** For the nitrite standard curve, 0, 0.2, 0.4, 0.6, 0.8 and 1 mL of as-prepared nitrate standard solutions ( $\text{NaNO}_3$  aqueous solutions) were transferred to different colorimetric tubes. Ammonium sulfamate solution (1 mL) was added to the colorimetric tubes and the solutions were diluted to 10 mL. The mixtures were well shaken and allowed to stand for 5 min at room temperature before being analysed by UV-vis spectroscopy with a characteristic absorption band at 219.0 nm.

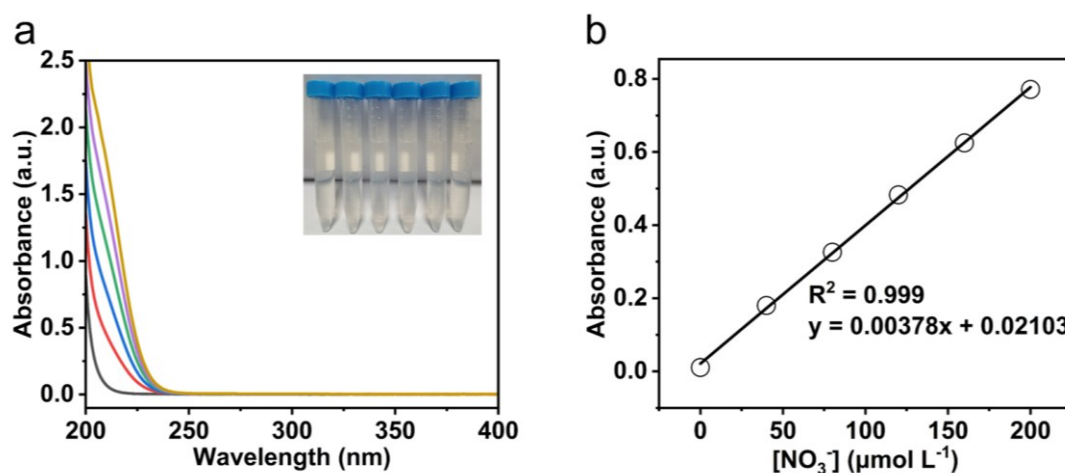

**Fig. S36** | Calibration curve used for calculation of  $\text{NO}_3^-$  concentrations.



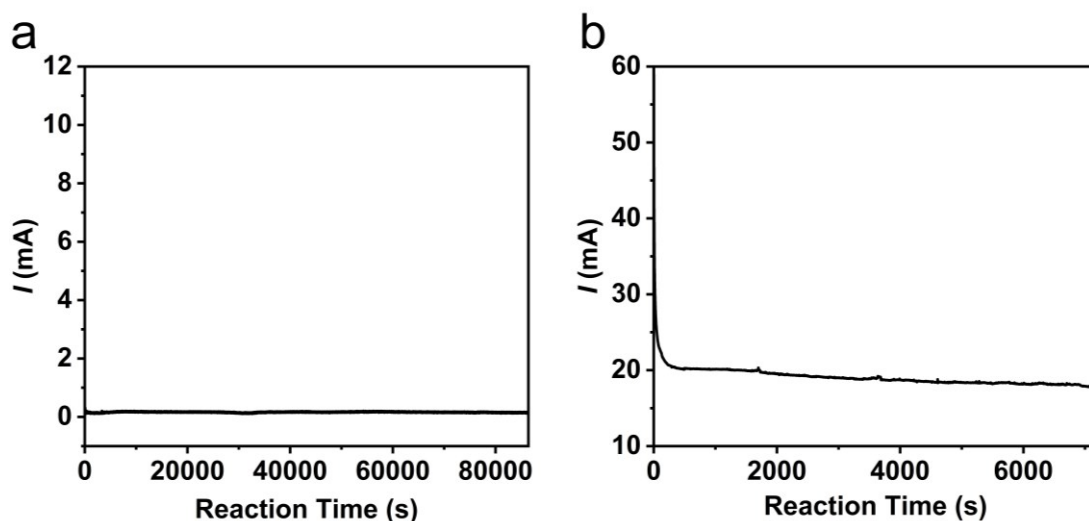

**Fig. S37** | CA response recorded from the CPC experiment of  $\text{NH}_3$  solution (2.0 M) in  $\text{CH}_3\text{CN}$  solution containing **1**- $\text{NH}_3$  (0.01 mM) at an applied potential of (a) 0.1 V, (b) 0.8 V vs.  $\text{Cp}_2\text{Fe}^{+/0}$  in natural light.

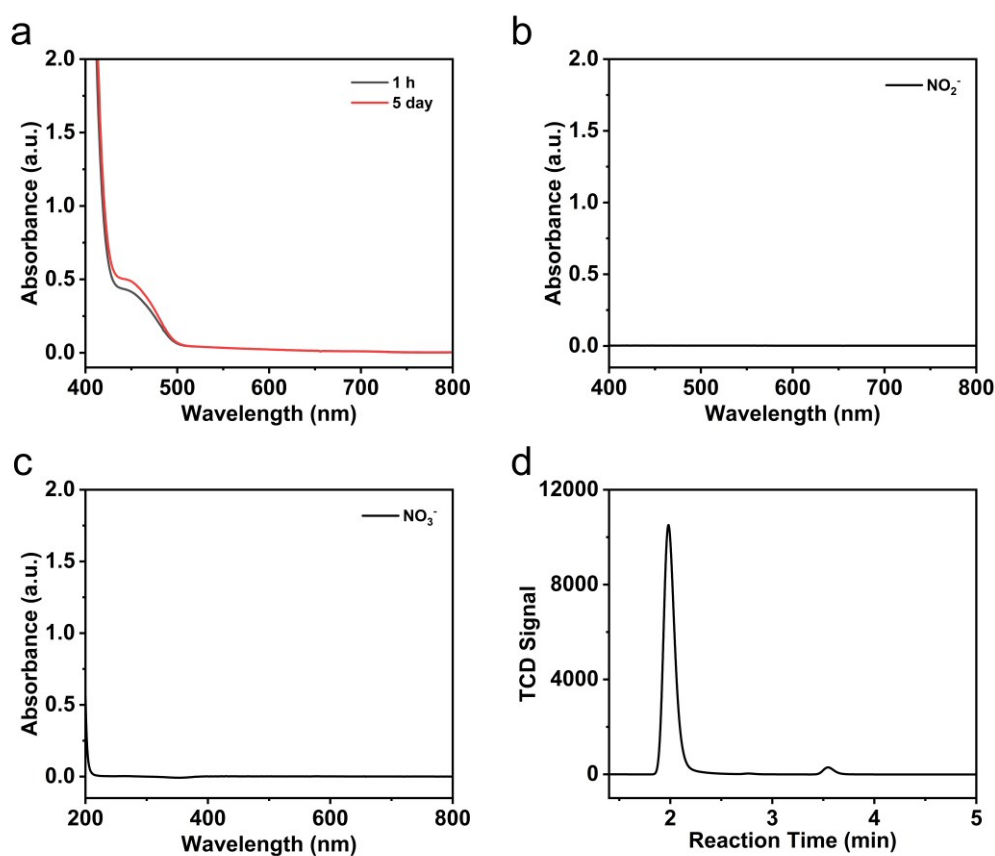

**Fig. S38** | Determination of (a)  $\text{N}_2\text{H}_4$ , (b)  $\text{NO}_2^-$ , (c)  $\text{NO}_3^-$  in the electrolyte and (d) GC-TCD trace of  $\text{H}_2$ ,  $\text{O}_2$  and  $\text{N}_2$  after the CPC experiment of  $\text{NH}_3$  solution (2.0 M) in  $\text{CH}_3\text{CN}$  solution containing **1**- $\text{NH}_3$  (0.01 mM) at an applied potential of 0.8 V vs.  $\text{Cp}_2\text{Fe}^{+/0}$  for 2 h in natural light.

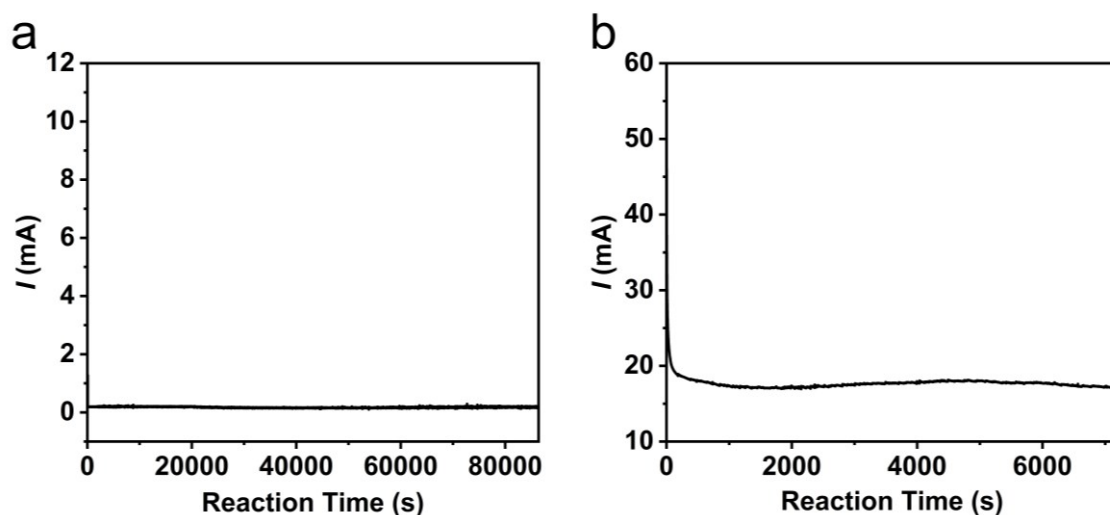

**Fig. S39** | CA response recorded from the CPC experiment of  $\text{NH}_3$  solution (2.0 M) in  $\text{CH}_3\text{CN}$  solution containing **1**- $\text{NH}_3$  (0.01 mM) at an applied potential of (a) 0.1 V, (b) 0.8 V vs.  $\text{Cp}_2\text{Fe}^{+/0}$  in the darkness.

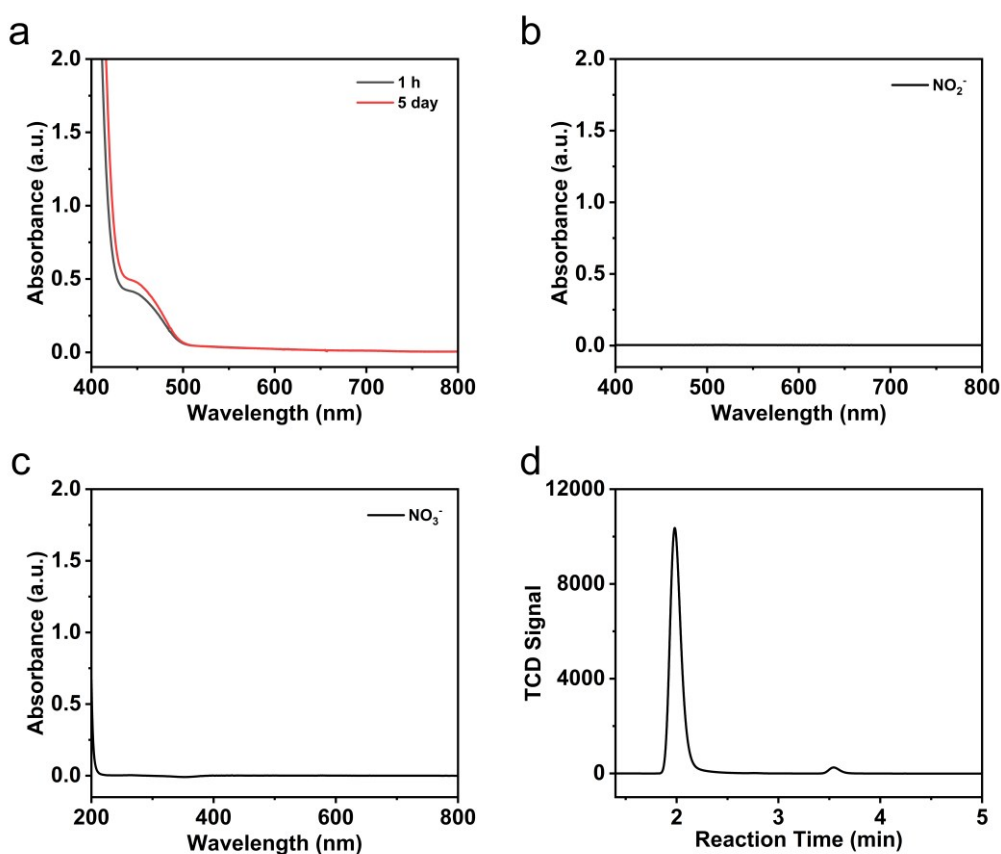

**Fig. S40** | Determination of (a)  $\text{N}_2\text{H}_4$ , (b)  $\text{NO}_2^-$ , (c)  $\text{NO}_3^-$  in the electrolyte and (d) GC-TCD trace of  $\text{H}_2$ ,  $\text{O}_2$  and  $\text{N}_2$  after the CPC experiment of  $\text{NH}_3$  solution (2.0 M) in  $\text{CH}_3\text{CN}$  solution containing **1**- $\text{NH}_3$  (0.01 mM) at an applied potential of 0.8 V vs.  $\text{Cp}_2\text{Fe}^{+/0}$  for 2 h in the darkness.

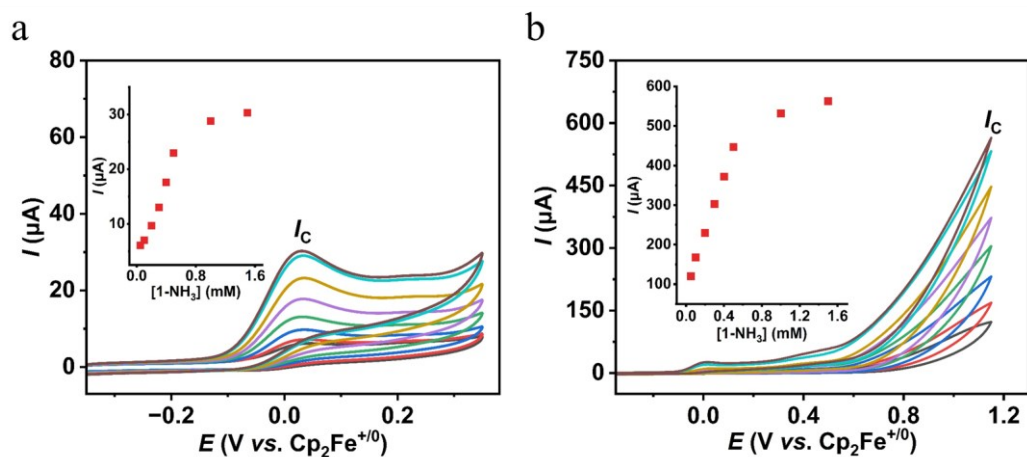

**Fig. S41** | The CVs of complex **1-NH<sub>3</sub>** (0.05, 0.1, 0.2, 0.3, 0.4, 0.5, 1.0, 1.5 mM) at different concentrations in the presence of 0.2 M NH<sub>3</sub> in CH<sub>3</sub>CN solution with scan rate at 100 mV s<sup>-1</sup>.

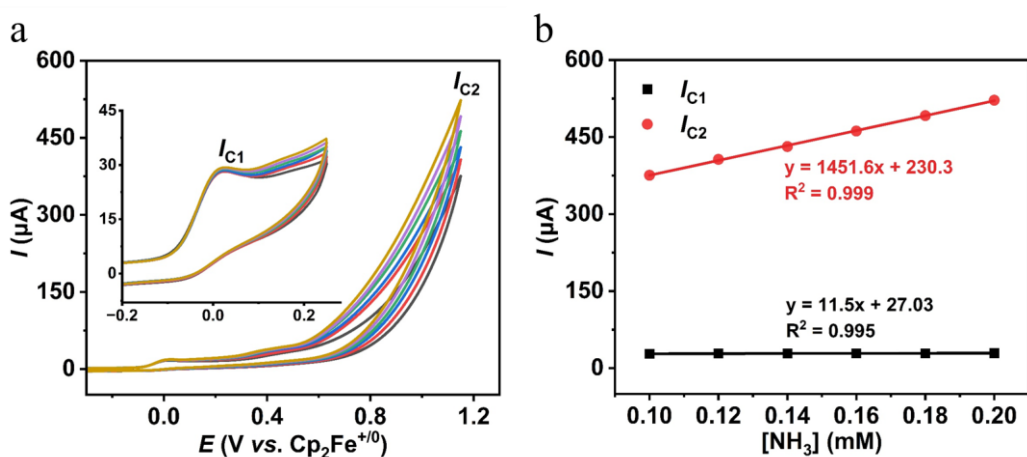

**Fig. S42** | a) CVs of 1 mM **1-NH<sub>3</sub>** in presence of different NH<sub>3</sub> concentrations (0.10, 0.12, 0.14, 0.16, 0.18, 0.20 M) in CH<sub>3</sub>CN with scan rate at 100 mV s<sup>-1</sup>. b) Plot of  $I_c$  vs.  $[\text{NH}_3]$ .

## DLS and SEM

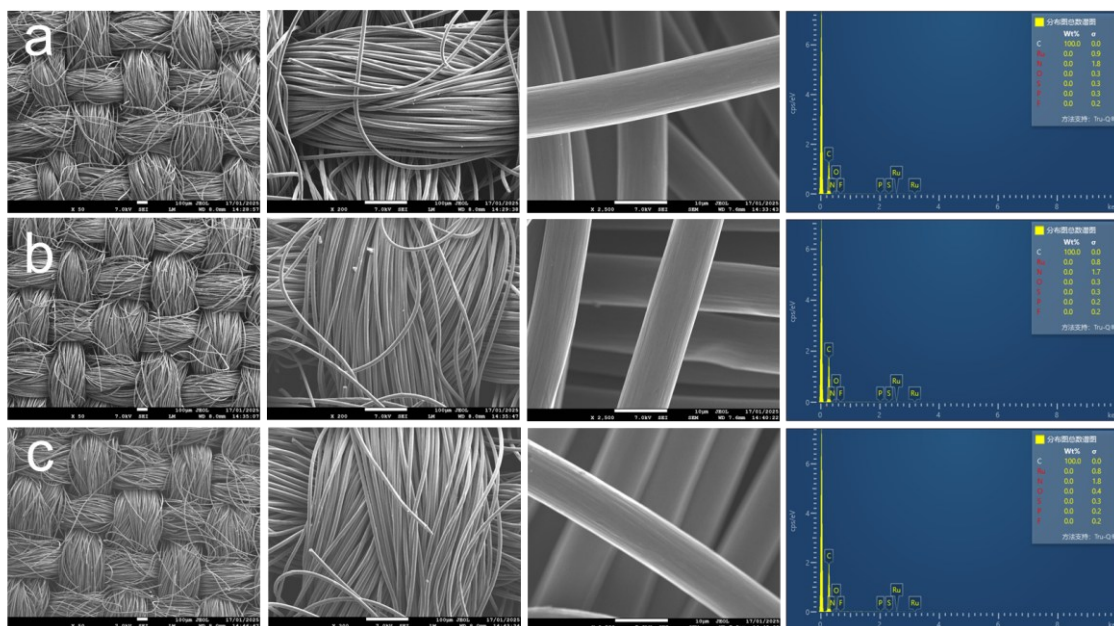

**Fig. S43** | SEM images of CC. (a) before; (b) after electrolysis of  $\text{NH}_3$  (2.0 M) in presence of  $\mathbf{1-NH_3}$  (0.01 mM) in  $\text{CH}_3\text{CN}$  solution under Ar atmosphere at applied potential of 0.8 V vs.  $\text{Cp}_2\text{Fe}^{+/0}$  for 2 h under natural light; (c) the washed CC after electrolysis. The scales of the first three SEM images in a, b, c represent 400, 100, 10 $\mu\text{m}$ , respectively.

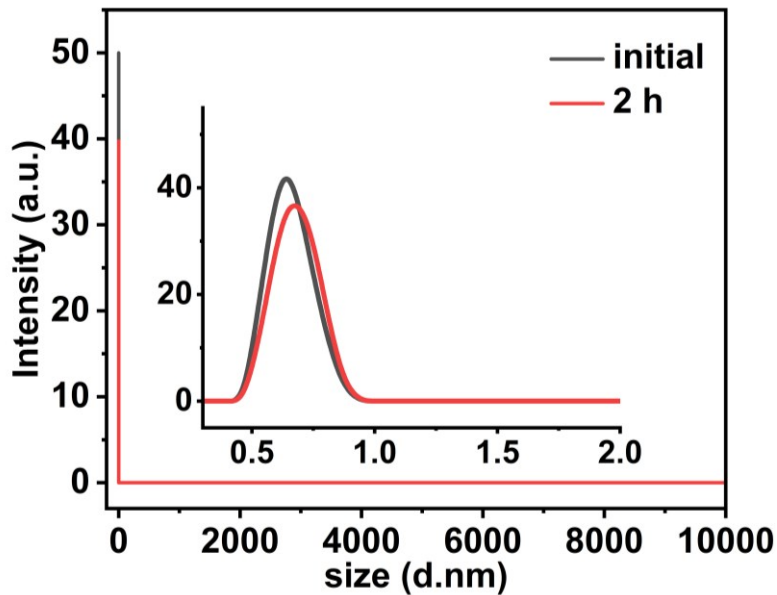

**Fig. S44** | DLS curves of (black) before and (red) after CPC experiments by  $\mathbf{1-NH_3}$  at  $E_{\text{app}}$  0.8 V vs.  $\text{Cp}_2\text{Fe}^{+/0}$  for 2 h under natural light.
